# 1 Striatal circuits support broadly 2 opponent aspects of action 3 suppression and production 4

5 Bruno F. Cruz<sup>1</sup>, Sofia Soares<sup>1</sup>, Joseph J. Paton<sup>1,2,\*</sup>

6 <sup>1</sup>Champalimaud Research, Champalimaud Centre for the Unknown, Lisbon, PT.

7 <sup>2</sup>Lead Contact

8 \*Correspondence: [joe.paton@research.fchampalimaud.org](mailto:joe.paton@research.fchampalimaud.org)  
9

## 10 Summary

11  
12 Imbalance between action suppression and production characterizes several basal  
13 ganglia (BG) disorders. Relatedly, the direct and indirect pathways of the BG are hypothesized  
14 to promote and suppress actions, respectively. Yet striatal direct (dMSNs) and indirect  
15 (iMSNs) medium spiny neurons are coactive around movement, apparently contradicting  
16 direct-indirect functional opponency. In the dorsolateral striatum of mice, we observed  
17 coactivation around movements, but elevated and diminished activity of iMSNs and dMSNs,  
18 respectively, during action suppression. Furthermore, relative activity of the two hemispheres  
19 evolved in opposite directions in the two pathways as the need to suppress movements to  
20 either side of the body developed over time. Lastly, optogenetic inhibition experiments  
21 revealed the necessity of iMSNs but not dMSNs for the proactive suppression of specific  
22 actions, and dMSNs but not iMSNs for generalized action vigor. These data demonstrate  
23 distinct yet still broadly opponent roles for the direct and indirect pathways in behavioral  
24 control.

## 25 Introduction

26

27 Adaptive behavior involves a judicious combination of suppression and production of  
28 actions. A predator must suppress its urge to pounce until its prey is within reach, just as  
29 humans must suppress giving in to temptation to secure longer-term rewards.

30

31 The basal ganglia (BG) are a collection of subcortical structures that are thought to  
32 regulate the appropriate selection of actions depending on expected consequences (Doya,  
33 1999; Schultz, 1995). In addition, the inability to balance action production and suppression is  
34 associated with disorders that involve the BG such as ADHD (Barkley, 1997), Parkinson's,  
35 and Huntington's diseases (Albin et al., 1989). Interestingly, two major BG pathways, the so-  
36 called direct and indirect pathways, possess anatomical and molecular characteristics  
37 consistent with promoting and suppressing actions, respectively (Alexander and Crutcher,  
38 1990; Gerfen and Surmeier, 2011). These two pathways originate in the major input area of  
39 the BG, the striatum, at direct striatonigral medium spiny neurons (dMSNs) and indirect  
40 striatopallidal medium spiny neurons (iMSNs) that project directly or indirectly toward the  
41 output areas of the BG. While multiple lines of evidence suggest functional opponency  
42 between the two pathways, an apparent discordance between neural activity on the one hand,  
43 and anatomical and cell type-specific perturbation data on the other has led to ongoing debate  
44 regarding the rules that govern BG circuit function.

45

46 As predicted by anatomy (Smith et al., 1998), activating dMSNs can rapidly suppress,  
47 while activating iMSNs can rapidly enhance, the activity of inhibitory output neurons of the  
48 BG in the substantia nigra (Deniau and Chevalier, 1985; Freeze et al., 2013; Kravitz et al.,  
49 2010). At a behavioral level, activation of dMSNs consistently produces opposite effects to  
50 those of activating iMSNs with respect to locomotion (Kravitz et al., 2010), ongoing motor  
51 sequence production (Sippy et al., 2015; Tecuapetla et al., 2016), reinforcement (Kravitz et  
52 al., 2012; Yttri and Dudman, 2016), and value-based decisions (Tai et al., 2012). However,  
53 the activity of dMSNs and iMSNs in sensorimotor striatum appears to be largely positively  
54 correlated around action initiation (Barbera et al., 2016; Cui et al., 2013; Tecuapetla et al.,  
55 2014) or around transitions between actions (Markowitz et al., 2018). Such observations of  
56 concurrent activation of the two pathways have been used to argue against the hypothesis  
57 that they functionally oppose each other (Cui et al., 2013; Tecuapetla et al., 2014).

58

59 A longstanding, and potentially reconciling, view of BG circuit function is that the two  
60 pathways might contribute to selection amongst various actions in a competitive manner  
61 (Denny-Brown and Yanagisawa, 1976; Mink, 1996; Redgrave et al., 1999). In this view, action  
62 selection proceeds through combined promotion of motor programs by the direct pathway,  
63 and suppression of motor programs by the indirect pathway. Such a model predicts broad  
64 coactivation of the two pathways during action production even as they function in opposition  
65 to each other. Notably, this framework also predicts that sustained suppression of action  
66 should promote large-scale decorrelation or even anticorrelation between the two pathways.  
67 This possibility, to our knowledge, remains untested. Activity of iMSNs should be elevated to  
68 suppress action, while the activity of dMSNs should be limited until action is released. Such  
69 observations would naturally reconcile currently disparate interpretations of BG circuit  
70 function.

71

72 To test this hypothesis we employed a variant of an interval discrimination task  
73 (Gouvêa et al., 2015; Soares et al., 2016) requiring a series of self-initiated and cued actions,  
74 and critically, a sustained period of action suppression. This design allowed us to assess  
75 whether the two pathways exhibited broad coactivation during action production and  
76 opponency during action suppression. Furthermore, the task requires dynamic suppression  
77 of distinct, lateralized behaviors over time, an ideal situation to assess whether the two  
78 pathways exhibit any action-specific opponent signals during action suppression. During this  
79 behavior, we then recorded activity from dMSNs and iMSNs in the dorsolateral striatum of  
80 mice using fiber photometry. We found that both pathways displayed phasic activation during  
81 action production, as previously reported. However, during action suppression we observed  
82 multiple clear signatures of functional opponency. First, overall iMSN activity was sustained  
83 whereas dMSN activity fell to or below baseline levels. Second, we observed evidence of  
84 action-specificity in these opponent signals in the form of opposite patterns of inter-  
85 hemispheric dynamics in the two pathways. A shift in the relative balance of activity between  
86 the two hemispheres developed during a trial as the need to suppress movement to one side  
87 of the body waned, and the need to suppress movement to the opposite side of the body grew.

88

89 To assess the functional importance of the observed patterns of neural activity, we  
90 performed a series of optogenetic inhibition experiments. These experiments provided further  
91 support for functional opponency and at the same time revealed a double dissociation  
92 between the respective roles of the direct and indirect pathways in dorsolateral striatum.  
93 Optogenetic inhibition of dMSNs, but not iMSNs, produced a slowing of movement whereas  
94 optogenetic inhibition of iMSNs, but not dMSNs, disrupted the ability of mice to suppress  
95 action.

96

97 These findings demonstrate clear opponency in the endogenous activity of the two  
98 major BG pathways during behavior, bringing into alignment molecular, anatomical,  
99 optogenetic and neurophysiological data in support of functional opponency between the two  
100 circuits. The data also suggest a novel mode of functional distinction between the two  
101 pathways. The direct pathway in sensorimotor striatum appears necessary for augmenting  
102 action vigor but, surprisingly, not the specification of which action is taken. The indirect  
103 pathway however, appears critical for sustained suppression of specific behaviors. These  
104 results not only help to resolve ongoing debate, but provide new insight into how BG circuitry  
105 can contribute to distinct aspects of action production and suppression, with broad implications  
106 for understanding the neural mechanisms of both normal and pathological behavioral control.

## 107 Results

### 108 Production and proactive suppression of action

109 We trained mice on a variant of a two-alternative interval categorization task wherein  
110 subjects were required to suppress movements during interval presentation. Briefly, trials were  
111 self-initiated by the mouse inserting their snout into a centrally located initiation nose port,  
112 eliciting a brief auditory tone (Fig 1a). Mice were required to maintain their position in the  
113 initiation port (fixation) until a second auditory tone was delivered. This second tone was

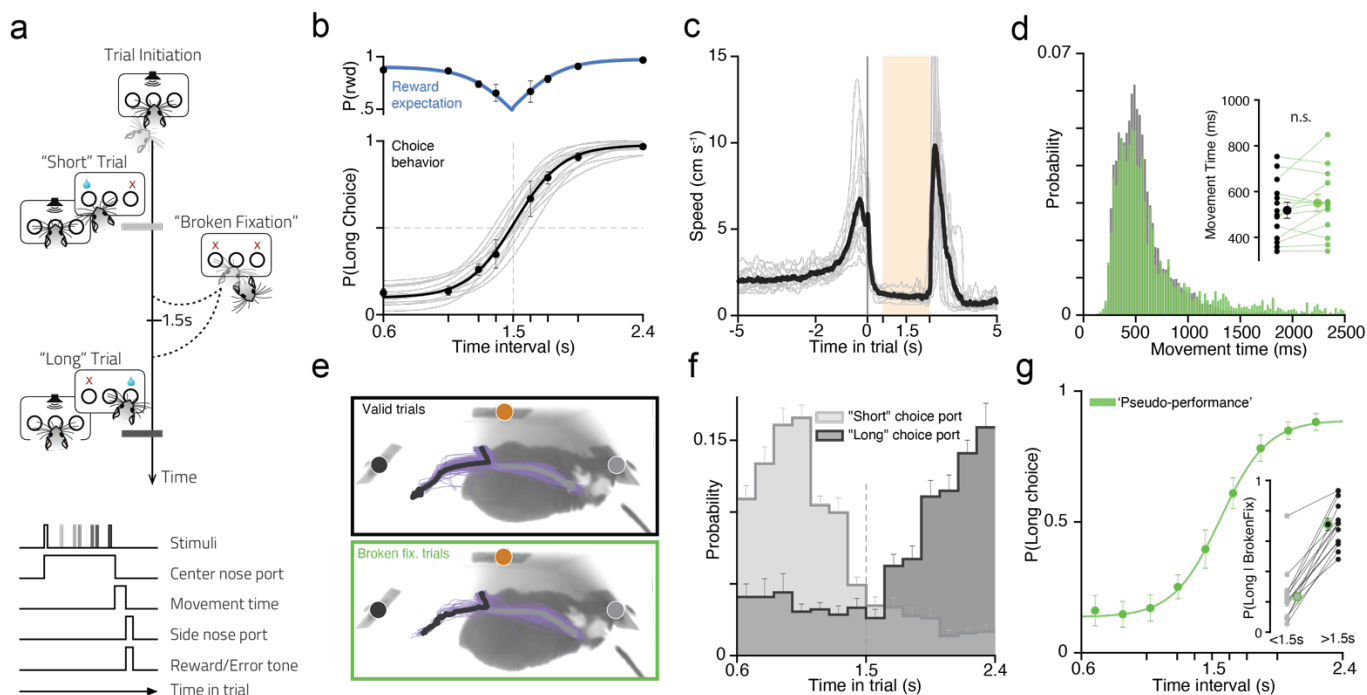

**Figure 1. Mice learned to dynamically suppress lateralized actions.** **a)** Task and event diagrams. Subjects self-initiate each trial in a center nose port. After a variable delay a second tone is played and they are asked to categorize the presented interval as “short” or “long” by responding in one of two side ports. Between the two tones subjects are required to maintain position in the centre port - “fixation”. **b)** Bottom: Psychometric fit to the performance of each mouse that underwent photometric recordings ( $n=14$ , light gray) and the fit to the overall average performance across mice (black). Top - Reward expectancy calculated from the overall performance of animals on a given stimuli (blue trace depicts the rectified psychometric fit at 1.5s) **c)** Animal’s head speed as a function of time aligned on trial initiation for a single session of each mouse that underwent photometric recordings during trials wherein the longest interval (2.4 seconds) was delivered and a correct choice performed. Gray, mean of individual animals; black, average of all mice ( $n=14$ ). Shaded region highlights period of immobility (0.6s to 2.4s post-trial initiation) **d)** Distribution of movement times, i.e. time taken for the animal to leave the centre port and report its choice, in completed trials (black) and broken fixation trials (green). Inset depicts the medians of movement times per animal for completed and broken fixation trials. **e)** Comparison of average nape trajectories, during a choice movement (-0.5 to 1.5 seconds relative to leaving the center port), for sessions of a single animal, for trials wherein animals chose the short (black) or long (gray) nose port on valid (top, black outline) or broken fixation (bottom, green outline) trials. Thinner purple lines depict single trials and circles represent the Long (Black), Initiation (Orange) and Short (Gray) nose ports. (see also: Fig. S8). **f)** Probability density functions of “broken fixations” over time during the immobility period (0.6s to 2.4s), contingent on subsequent choice at one of the side ports. **g)** Average overall “pseudo-performance” of all animals used in the photometric recordings calculated from broken fixation trials. To calculate the performance in broken fixation trials, we binned the times at which animals aborted the trial and calculated the proportion of reports at the “long choice” port over all reports. Inset depicts single animal probability of choosing long as a function of breaking fixation before (<1.5s) or after (>1.5s) the decision boundary. All error bars represent s.e.m. across animals ( $n = 14$ ).

114 delivered at a delay that was randomly chosen from a set of 6 intervals, symmetric about 1.5s,  
 115 and ranging from 0.6s to 2.4s. After delivery of the second tone, animals were free to choose  
 116 either of two choice ports located at an equal distance to either side of the initiation port.  
 117 Rewards were delivered for choices to one side (“short” choice) if the presented interval was  
 118 shorter than a 1.5s decision boundary, and at the opposite choice port (“long” choice) if the  
 119 interval was longer than 1.5s. Mice learned to categorize interval stimuli much longer or shorter  
 120 than the decision-boundary with high accuracy ( $92.1 \pm 0.7\%$ , 0.6s and 2.4s intervals,  
 121 mean  $\pm$  s.e.m.  $n = 14$  mice), yet choices were more variable for intervals nearer to the

122 decision-boundary (Fig 1b). In addition, mice produced a stereotyped movement profile over  
123 each trial (Fig 1c). Movement speed increased leading to trial initiation, followed by a brief  
124 period of postural adjustment before animals settled into immobility until the second tone was  
125 delivered. Immediately following second tone delivery, movement speed increased again as  
126 animals executed their choices. If animals failed to maintain fixation in the initiation port until  
127 the second tone, an error tone was immediately delivered and the trial was terminated  
128 ( $36.5 \pm 2.1\%$  of all trials,  $n=14$  mice). We will refer to these trials as *broken fixations* throughout  
129 the text. Interestingly, animals often entered a choice port even after breaking fixation and  
130 aborting the trial ( $52.1 \pm 4.9\%$  of all broken fixation trials,  $n=14$  mice). These choices were  
131 executed with a similar timecourse as valid choices (Fig.1 d-e, Movement time valid trial vs  
132 broken fixation trial =  $-31.643$  [ $-76.89, 13.60$ ] ms,  $p = 0.155$ , two-tailed paired t-test, Effect  
133 Size, 95%[CI], p-value) and were largely “appropriate”, toward the “short” choice port when  
134 breaking early in a trial, and toward the “long” port when breaking late in a trial (Fig 1f-g). The  
135 pattern of broken fixations reflects the overall reward associated with the two choices over  
136 time, and not the likelihood of second tone occurrence (Fig. S1). These data are consistent  
137 with animals developing a dynamic motor plan that remains latent as long as it is successfully  
138 suppressed. Failure to suppress this temptation led to premature execution of the planned  
139 action.  
140

## 141 Opposite modulation of striatal direct and indirect pathways 142 during action suppression

143 To probe the large-scale activity of the direct and indirect pathways for signs of  
144 functional opponency during mobility and active suppression of lateralized movements, we  
145 recorded the activity of dMSNs and iMSNs in the dorsolateral striatum during task  
146 performance. We combined mouse lines expressing Cre recombinase in either dMSNs (D1-  
147 Cre EY217Gsat line) or iMSNs (A2a-Cre, KG139Gsat line) with cre-dependent viral  
148 expression of the calcium indicator GCaMP6f (Chen et al., 2013)(Fig. 2a-b), using coordinates  
149 previously shown to contain coactive dMSNs and iMSNs during movement (Cui et al., 2013)  
150 (Fig.2c). No significant differences in behavior were detected between the two mouse lines  
151 (Fig. S2). We then used fiber photometry (Matias et al., 2017; Soares et al., 2016)(Fig. 2 d-e)  
152 to access the pooled activity of a local population of dMSNs or iMSNs in the dorsolateral  
153 striatum. To determine whether gross differences in activity patterns were present across a  
154 trial, we first examined the combined activity of neurons located in both hemispheres. In  
155 individual animals, we observed that activity of either dMSNs or iMSNs increased around task  
156 epochs when animals were required to take action, namely trial initiation and choice execution,  
157 consistent with the commonly observed coactivation of the two pathways (Fig. 2 f-g). Indeed,  
158 across all animals, though the time courses of activity appeared to differ slightly, the mean  
159 activity of the two pathways was indistinguishable around trial initiation (Fig. 2 h-i, iMSN vs  
160 dMSN =  $0.141$  [ $-1.09, 1.37$ ]  $z\Delta F/F$ ,  $p = 0.8065$ ). However, activity in dMSNs and iMSNs  
161 displayed marked differences during interval presentation, when mice were required to  
162 suppress movement (Fig. 2 h-i). Across all animals, iMSN activity was elevated relative to  
163 dMSN activity (Fig. 2 h-i, Fig. S3a, iMSN>dMSN =  $0.783$  [ $-0.071, 1.64$ ]  $z\Delta F/F$ ,  $p = 0.0345$ ),  
164 This opponent pattern grew as the period of sustained action suppression wore on, perhaps  
165 reflecting the growing need to suppress action as expectation of cue delivery grew during a  
166 trial and as mice became certain that a choice to the long port would ultimately be rewarded.



167 Indeed, we detected modest yet significant upward and downward deviations in the rate of  
 168 change of activity in dMSNs and iMSNs preceding broken fixations as compared to time-  
 169 matched control periods (Fig. S3,d), indicating that disturbances in activity patterns in the two  
 170 pathways were associated with the failure to successfully suppress action.

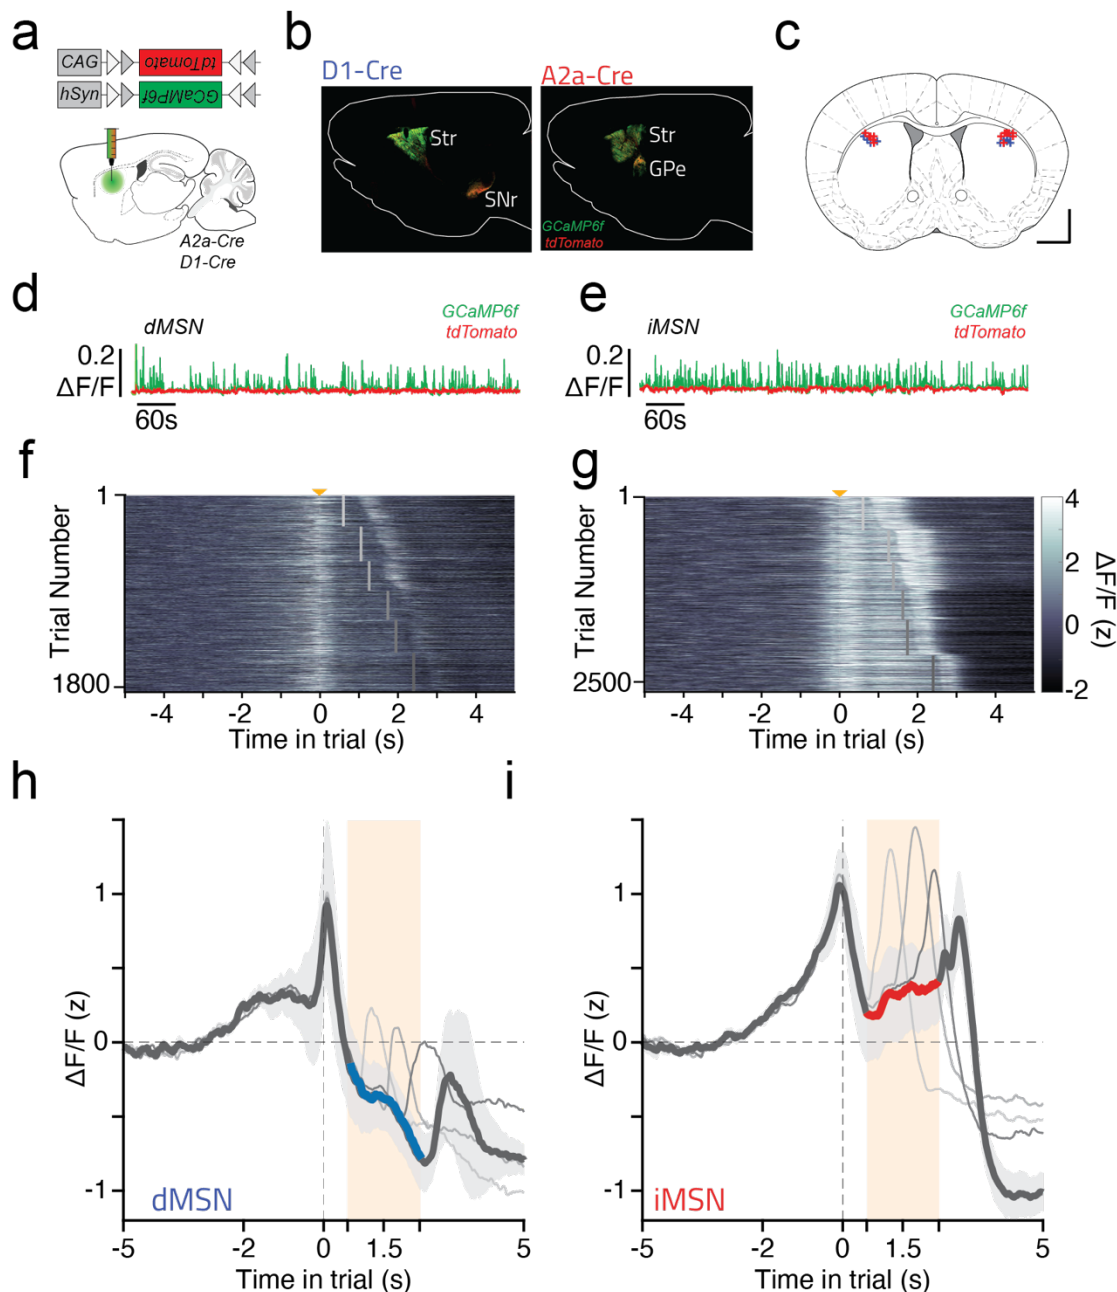

**Figure 2. Medium spiny neurons of the direct and indirect pathway exhibited opposite patterns of overall activity during periods of action suppression.** **a**) Viral strategy used to record  $\text{Ca}^{2+}$  signals in dorsal striatum. **b**) Pattern of transgene expression in A2a-Cre (iMSN) or D1-Cre (dMSN) animals in sagittal section, ~2.1mm ML. Str-Striatum, GPe-Lateral globus pallidus, SNr-Substantia nigra pars reticulata. **c**) Histological reconstruction of sites of fiber implantation for photometry. Coronal slice (+0.5AP) adapted from (Franklin and Paxinos, 2008). Scale bar = 1mm. **d-e**) example of photometric traces in direct (**d**) and indirect (**e**) pathway MSNs. **f,g**) Single-trial photometric data (z-scored, see methods) for all correct trials of a single D1-cre (**f**) and A2a-cre (**g**) animal across all sessions aligned to trial initiation (yellow arrow). Interval offset is represented as a vertical grey bar, where darker grey represents longer intervals. Trials were further ordered within interval by reaction time. **h,i**) Average activity (z-scored) across all animals of a given genotype (dMSN n=6, iMSN n=8). Darkest trace represents activity during the longest interval within the interval set (2.4

seconds) and lighter gray traces corresponding to a subset of shorter intervals. Colored segments of the trace highlight period of immobility (0.6s to 2.4s post trial initiation) wherein average activity was significantly different in the two pathways (0.6s to 2.4s,  $p < 0.05$ ). Error bars represent s.e.m. across animals.

171 To assess whether the need to suppress action in general might grow over time during a trial,  
172 we computed the probability that mice break fixation at each time bin within the delay period  
173 conditioned on their not having broken fixation up to that point, a quantity known as the hazard  
174 rate. In the context of this behavioral task, computing the hazard rate as opposed to the overall  
175 probability of breaking fixation (Fig. 1f, Fig. S1) effectively controls for the fact that animals  
176 experienced more instances of early time bins in the delay and thus had more opportunities  
177 to break fixation early in the delay. The hazard rate of broken fixation behavior demonstrates  
178 that after a brief dip in broken fixation around the decision boundary, the likelihood of breaking  
179 fixation rises dramatically (Fig. S1). We next examined the hazard rates of broken fixation  
180 conditioned on subsequent choice, and found that the early mode in the overall hazard rate of  
181 broken fixations was comprised of trials where the mice subsequently made a short choice,  
182 whereas the late rise in the overall hazard was comprised of trials where mice subsequently  
183 made a long choice (Fig. 3a). Notably, not only is the task requirement that mice map earlier  
184 times in a trial onto action towards one side of the body and later times in a trial onto action  
185 towards the other side of the body reflected in the probability of broken fixations and  
186 subsequent choices over time, but the urge to break fixation in a particular direction is  
187 asymmetric. The urge to break fixation and make long choices late in the trial appears to far  
188 outweigh the urge to break fixation and make short choices early in the delay period. If MSN  
189 activity during successfully completed trials acted to suppress these lateralized urges to act  
190 early and late, we might expect differences in the time course of activity between the two  
191 hemispheres. Indeed, in the hemisphere contralateral to the rewarded location for “long”  
192 stimuli (contra-long, CL, Fig. 3b) iMSN and dMSN activity steadily increased and decreased  
193 throughout the delay period, respectively (Fig. 3c, Fig. S3b, difference between pre and post  
194 decision boundary mean activity: iMSN:CL = 0.423 [0.006 0.840] $z\Delta F/F$ ,  $p = 0.0462$ , dMSN:CL  
195 -0.535 [-1.017 -0.054] $z\Delta F/F$ ,  $p = 0.0272$ ).

196  
197

198 In contrast, in the hemisphere contralateral to the rewarded location for “short” stimuli  
199 (contra-short, CS, Fig. 3b) activity levels in both pathways were relatively constant as  
200 compared to the CL hemisphere (Fig. 3c, Fig. S3b, iMSN:CS = -0.104 [0.521 0.313] $z\Delta F/F$ ,  $p$   
201 = 0.928, dMSN:CS -0.040[-0.052 0.442] $z\Delta F/F$ ,  $p = 0.999$ ). These data reflect a situation  
202 where lateralized patterns of activity reflected the strength of urge to move contralaterally over  
203 time. Thus, relative levels of activity between the two hemispheres varied over time, and in  
204 opposite directions in the two pathways (Fig. 3d). Such observations may indicate that BG  
205 circuitry residing in a particular hemisphere is preferentially recruited to suppress movements  
206 to the contralateral direction when and to the degree that the animal is tempted to move in  
207 that direction.

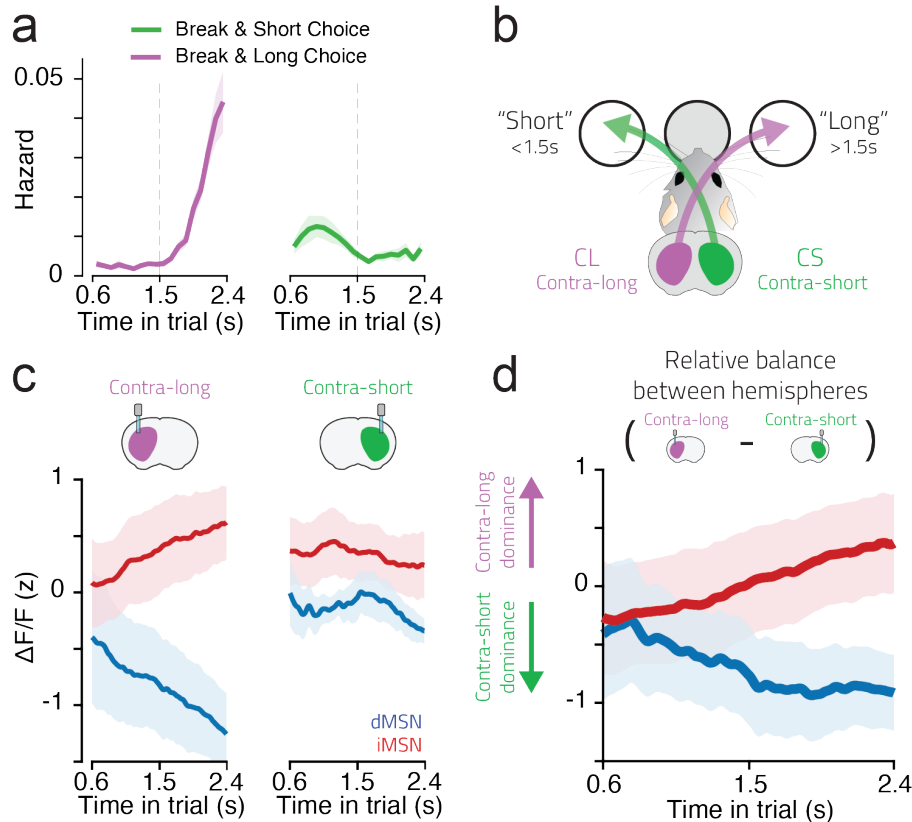

**Figure 3. dMSNs and iMSNs exhibited opposite patterns of relative activity between the two hemispheres that reflected the need to suppress particular lateralized actions over time.** **a)** Hazard rate of broken fixation trials (see methods) wherein animals subsequently made a choice at the port corresponding to a short (green) or long (purple) choice. **b)** Schematic of labelling convention, the three large circles represent the three nose ports present in the behavioral task apparatus. The filled grey circle represents the trial initiation port, while the unfilled circles represent the two choice ports. **c)** Averaged normalized activity recorded from the hemisphere contra-lateral to a long (left panel) or short choice (right panel) port (z-scored) across all iMSN (red) and dMSN (blue) mice. Only correct completed trials were included. **d)** Average of all pairwise differences in immobility period activity of dMSNs and iMSNs between the two hemispheres, subtracting activity recorded in hemispheres contralateral to the "long" choice port from activity recorded in hemispheres contralateral to the "short" choice port (i.e., CL activity - CS activity). Error bars represent s.e.m. across animals.

## 208 Broadly opponent yet distinct functional contributions of striatal 209 direct and indirect pathways to the control of action

210 To test whether the observed opponent patterns of neural activity in the two pathways  
211 reflected true functional opponency or whether they amounted to simply a correlation with the  
212 predictions of the opponent function hypothesis, we next performed a series of optogenetic  
213 inhibition experiments. We combined the same Cre lines used to label MSNs in photometry  
214 experiments with cre-dependent viral expression of the light-activated proton pump ArchT  
215 (Han et al., 2011) and implanted tapered optical fibers (Pisanello et al., 2017) in the dorso-  
216 lateral striatum to enable inhibition of iMSN or dMSN activity during action suppression (Fig.  
217 4a-c,e and Fig.5b). We first characterized the effect of photoinhibition on neuronal firing by  
218 performing extracellular electrophysiological recordings from striatal neurons during a quiet



219 awake state in the absence of a behavioral task (Fig. 4d, 5a, Fig. S4a-d). Illumination of striatal  
 220 tissue produced rapid, sustained and reversible inhibition of firing in both iMSN-ArchT and

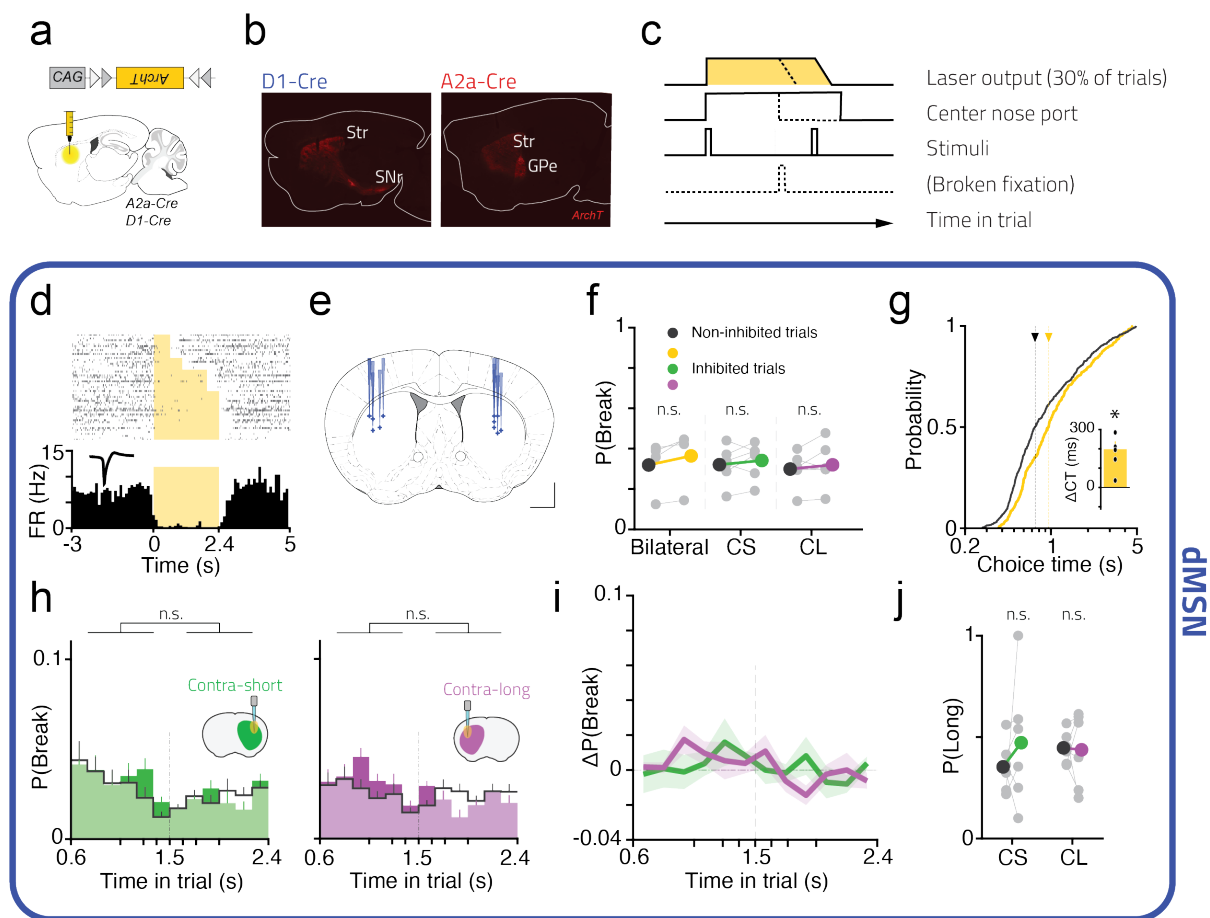

**Figure 4. Optogenetic inhibition of dMSNs slowed movement, but did not affect action suppression or selection.** **a**) Viral strategy and **b**) Pattern of ArchT expression in D1-Cre (dMSN) or A2a-Cre (iMSN) animals in sagittal section, ~2.1mm ML. Str-Striatum, GPe-globus pallidus externus, SNr-Substantia nigra pars reticulata. **c**) Protocol of optogenetic manipulation. Laser was turned on at trial onset and ramped off at stimulus offset or broken fixation, whichever occurred first. **d**) Raster plot (top) and PSTH (bottom) of a single dMSN exhibiting fast and reliable inhibition (see also: Fig. S4). **e**) Histological reconstruction of sites of fiber implantation for optogenetic experiments in D1-Cre mice. The DV coordinate is shown as the deepest position the tapered fiber lesion was observed in histological slices. Coronal slice (+0.5AP) adapted from (Franklin and Paxinos 2008). Scale bar = 1mm. **f**) Overall probability of breaking fixation during dMSN inhibition experiments. Colored and black dots represent data from laser-on and laser-off trials, respectively. Grey dots represent single animals. Data is shown for trials where manipulation was applied bilaterally (yellow), or unilaterally to the hemisphere either contra-lateral to the location of short choice port (CS, green) or contra-lateral to the long choice port (CL, purple). All broken fixations were included. **g**) Cumulative distribution of choice times during dMSN inhibition experiments (i.e. time to travel from the center port to a side port) after broken fixation trials for manipulated (yellow) and non-manipulated (black) conditions of all animals. Dashed lines show the median of the distributions. Inset shows the difference in medians of the two distributions for single animals (manipulated - non-manipulated) (see also: supplementary Fig. S6). **h**) Probability of breaking fixation as a function of elapsed time since trial initiation, for manipulated trials (green and purple) and session matched non-manipulated trials (black outline) in sessions wherein dMSNs in the hemisphere contra-lateral to a short choice (left panel) or contra-lateral to a long choice (middle panel) (see methods). **i**) difference between dMSN manipulated and control distributions of the probability of breaking fixation over time. **j**) Probability of reporting at the “long choice” port after breaking fixation during dMSN inhibition experiments. All trials wherein the mice reported a choice after breaking fixation were included. Grey dots show single animals. All error bars represent s.e.m across mice. n.s.:  $p > 0.05$ ; \*:  $p < 0.05$ , also see Supplemental Table 1.

221 dMSN-ArchT mice, indicating similar levels of inhibition of the two pathways. We then  
222 delivered green light to the fiber(s) on a random minority of trials (30%), starting at trial initiation  
223 and ramping off over 250ms starting at either the second tone onset or when the animal broke  
224 fixation, whichever occurred first (Fig. 4c). Bilateral optogenetic inhibition of iMSNs produced  
225 a near-complete inability of mice to suppress movement during interval presentation (Fig. 5c).  
226 Animals broke fixation on  $35\pm 6\%$  ( $n=4$  mice) of non-inhibited trials and on  $86\pm 7\%$  of trials  
227 when iMSNs were inhibited bilaterally (Fig. 5c, mixed-effects model, Interaction  
228 Genotype:Hemisphere:Laser,  $p < 10^{-4}$ , odds ratio iMSN:Bilateral:LaserOff /  
229 iMSN:Bilateral:LaserOn = 0.0585 [0.0362, 0.0945],  $P < 0.05$ ). However, levels of broken  
230 fixation were unaffected by bilateral inhibition of dMSNs during equivalent trial epochs (Fig.  
231 4f, odds ratio dMSN:Bilateral:LaserOff / dMSN:Bilateral:LaserOn = 0.8177[0.6271, 1.0664],  
232  $p = 0.3544$ ). On broken fixation trials followed by movement toward a choice port, the first  
233 250ms of this movement overlapped with the ramping off of the light stimulation. We therefore  
234 asked whether these movements were affected by inhibition of either iMSNs or dMSNs. In  
235 contrast to the observed effect of iMSN inhibition on action suppression, we found that dMSN  
236 inhibition, but not iMSN inhibition, resulted in a significant increase in movement time during  
237 broken fixation trials (Fig. 4g, 5d, iMSN:laserOff vs iMSN:laserOn = 7.82 [-482, 497.3] ms,  $P$   
238 = 1; dMSN:laserOff vs dMSN:laserOn = -630.30 [-1193, 97.6] ms,  $P = 0.021$ ), consistent with  
239 a role specifically for the direct pathway in augmenting the vigor of movements (Turner and  
240 Desmurget, 2010). Furthermore, dMSN activity in the DLS was specifically necessary for  
241 movement invigoration immediately in advance of movement initiation, as movement times  
242 were not affected during valid trials, when the laser began ramping off during the time it took  
243 animals to initiate their choice movement, nor in a subset of experiments when inhibition was  
244 applied during execution of the choice movement, starting when animals left the initiation port  
245 (Fig. S5).

246  
247

248 Given the observed interhemispheric dynamics in the photometry signals collected  
249 from MSNs (Fig. 3), we next asked whether unilateral MSN inhibition would disrupt action  
250 suppression preferentially at the times when activity in a given hemisphere appeared to be  
251 most engaged. Indeed, while unilateral iMSN inhibition produced a more modest increase in  
252 broken fixations overall (Fig. 5c), the timing of broken fixations was systematically related to  
253 the laterality of inhibition. Mice were more likely to break fixation early or late when iMSNs  
254 contralateral to the “short” or “long” choice were inhibited, respectively, as compared to non-  
255 inhibited trials (Fig. 5e). Taking the difference in probability of breaking fixation between  
256 inhibited and control trials as a function of time during the trial gives a measure of the time-  
257 course of the effect on action suppression for each hemisphere. Superimposed, these two  
258 measures cross near the 1.5s decision boundary (Fig. 5f, right, Fig. S6a), mirroring the precise  
259 contingency between reward and action over time during a trial. These data provide strong  
260 evidence that proactive suppressive control is handed off from the indirect pathway of one  
261 hemisphere to its counterpart on the opposite hemisphere around the time animals should be  
262 switching the direction of their planned movement from one side of the body to the other. Once  
263 again, we observed no consistent effects of inhibiting dMSNs on the timing of broken fixations  
264 (Fig. 4h-i).

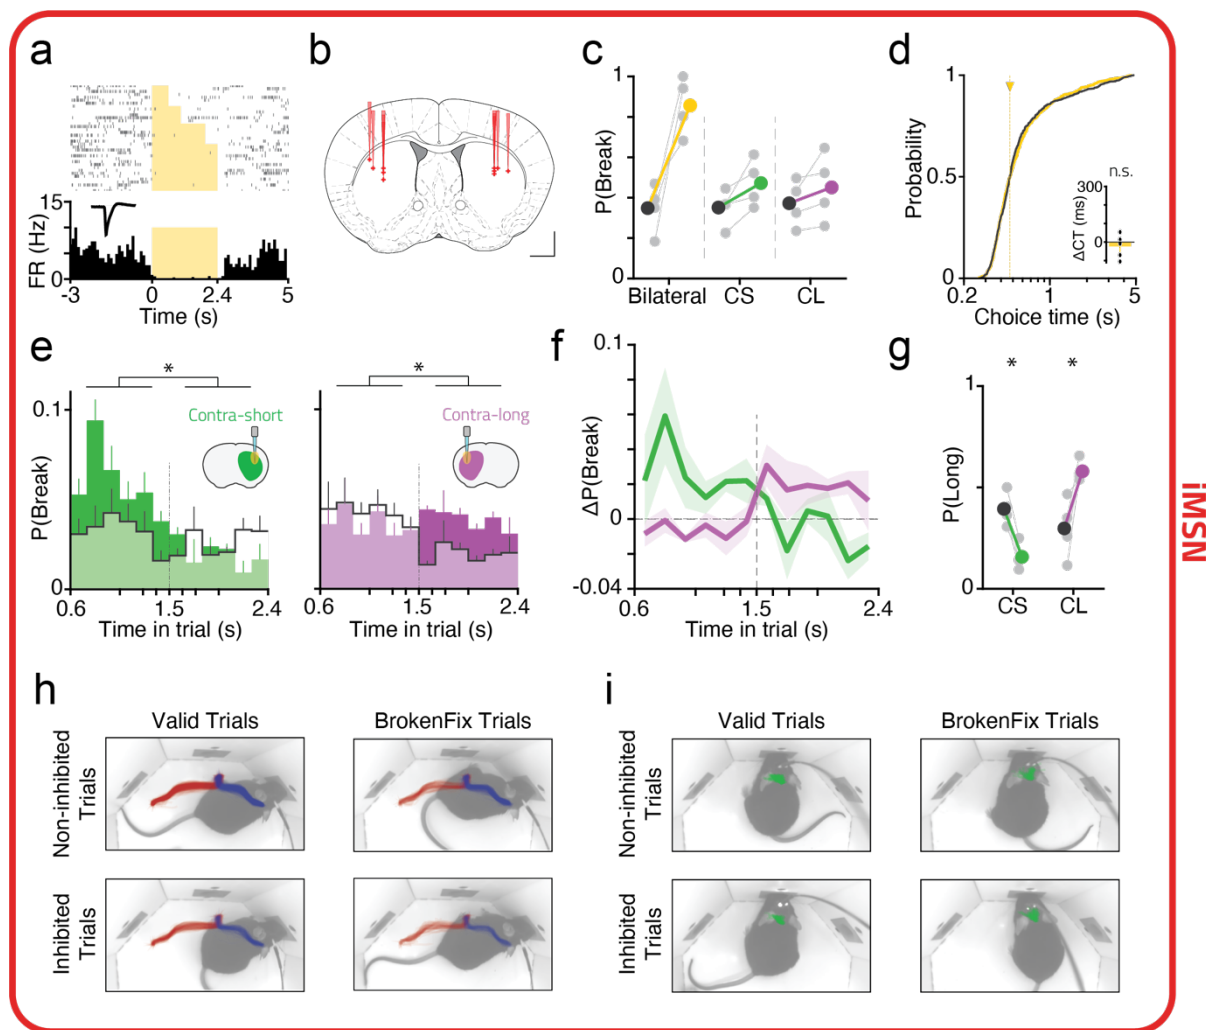

**Figure 5. Optogenetic inhibition of iMSNs disrupted action suppression and selection, but did not affect movement speed.** **a**) Raster plot (top) and PSTH (bottom) of a single iMSN exhibiting fast and reliable inhibition, recorded from an untrained animal (see also: Fig. S4). **b**) Histological reconstruction of sites of fiber implantation for optogenetic experiments in A2a-Cre mice. The DV coordinate is shown as the deepest position the tapered fiber lesion was observed in histological slices. Coronal slice (+0.5AP) adapted from (Franklin and Paxinos 2008). Scale bar = 1mm. **c**) Overall probability of breaking fixation during iMSN inhibition experiments. Colored and black dots represent data from laser-on and laser-off trials, respectively. Grey dots represent single animals. Data is shown for trials where manipulation was applied bilaterally (yellow), or unilaterally to the hemisphere either contra-lateral to the location of short choice port (CS, green) or contra-lateral to the long choice port (CL, purple). All broken fixations were included. **d**) Cumulative distribution of choice times during iMSN inhibition experiments (i.e. time to travel from the center port to a side port) after broken fixation trials for manipulated (yellow) and non-manipulated (black) conditions of all animals. Dashed lines show the median of the distributions. Inset shows the difference in medians of the two distributions for single animals (manipulated - non-manipulated) (see also: supplementary Fig. S5). **e**) Probability of breaking fixation as a function of elapsed time since trial initiation, for manipulated trials (green and purple) and session matched non-manipulated trials (black outline) in sessions wherein iMSNs in the hemisphere contra-lateral to a short choice (left panel) or contra-lateral to a long choice (middle panel) (see methods). **f**) difference between iMSN manipulated and control distributions of the probability of breaking fixation over time. **g**) Probability of reporting at the “long choice” port after breaking fixation during iMSN inhibition experiments. All trials wherein the mice reported a choice after breaking fixation were included. Grey dots show single animals. **h**) Example trajectories for a single animal aligned to center-out or for choices to the “Long port” (red) or “Short pot” (blue) for all conditions combinations (i.e. Trial type x Manipulation). **i**) Same as in **h**), but with trials aligned to trial initiation. Also see Fig. S7. All error bars represent s.e.m across mice. n.s.:  $p > 0.05$ ; \*:  $p < 0.05$ , also see Supplemental Table 1.

265           Lastly, given the widely assumed importance of BG circuits in action selection, we  
266 asked whether inhibition of MSNs affected the probability that particular actions were  
267 executed. When inhibiting iMSNs, we observed a consistent increase in the probability that an  
268 animal would execute a choice to the port contralateral to the site of iMSN inhibition, as  
269 compared to non-inhibition trials, after breaking fixation (Fig. 5g). This effect did not simply  
270 reflect the fact that animals were more likely to make short or long choices after early or late  
271 broken fixations, respectively, because it was present in broken fixations made both before  
272 and after the decision-boundary (Fig. S6c). Features of the choice movements following iMSN  
273 inhibition, as quantified through high-speed tracking of the animals' nape, were  
274 indistinguishable from choice movements performed in the absence of iMSN inhibition (Fig.  
275 5h-i, Fig. S7). Once again, we observed no significant effect of unilateral dMSN inhibition on  
276 lateralized choice behavior after broken fixations (Fig. 4j) (odds ratio iMSN:CL:LaserOff  
277 /iMSN:CL:LaserOn = 0.257[0.1430, 0.463],  $P < 10^{-4}$ , iMSN:CS:LaserOff / iMSN:CS:LaserOn  
278 = 3.369[1.7069, 6.651],  $P < 10^{-4}$ , dMSN:CL:LaserOff / dMSN:CL:LaserOn = 0.917[0.4484,  
279 1.875],  $p = 1$  dMSN,CS,LaserOff / dMSN,CS,LaserOn = 0.737[0.3782, 1.438],  $p = 0.87$ ), even  
280 when dMSN inhibition was applied during execution of the choice movement (Figure S5).  
281 These data, together with the observed inter-hemispheric dynamics of the endogenous activity  
282 of iMSNs, strongly suggest that the indirect pathway of a given hemisphere is engaged to  
283 suppress contralateral movements when those particular actions would be tempting and thus  
284 in greater need of suppression.  
285

## 286 Discussion

287  
288           Here we demonstrate for the first time, to our knowledge, clear activity signatures of  
289 large-scale functional opponency between neurons initiating the two major BG pathways in  
290 the normal, non-pathological state. In particular, we observe opposite patterns of activity in  
291 the two pathways when movements must be proactively and persistently suppressed.  
292

293           Action suppression can be broadly separated into two classes. Reactive suppression  
294 involves stopping behavior in course when presented with an external stimulus. In contrast,  
295 proactive suppression involves selectively inhibiting particular response tendencies using  
296 advance knowledge. The behavioral context we studied requires proactive suppression of time  
297 varying response tendencies to move to the left or right. When subjects were required to  
298 suppress the urge to move in a given direction, on average iMSNs located contralaterally to  
299 that direction exhibited higher levels of activity than iMSNs located ipsilaterally. Consistent  
300 with these data, functional magnetic resonance imaging data in humans and  
301 electrophysiological data in non-human primates suggests that iMSNs might be selectively  
302 engaged to proactively suppress action (Amita and Hikosaka, 2019; Ford and Everling, 2009;  
303 Majid et al., 2013; Watanabe and Munoz, 2010). Leveraging the genetic access to iMSNs and  
304 dMSNs afforded by the use of mice as a model organism, our data clearly establishes not only  
305 that iMSNs in the DLS were selectively engaged as animals suppressed particular lateralized  
306 response tendencies, but that iMSNs, and not dMSNs, were necessary for it. In addition,  
307 successful action suppression relied on iMSNs in a given hemisphere at different points in  
308 time depending on learned task demands, indicating that specific subpopulations of iMSNs  
309 can be deployed to dynamically shape action suppression in time. While multiple studies to



310 date have observed coactivation of dMSNs and iMSNs around movement (Cui et al., 2013;  
311 Markowitz et al., 2018; Tecuapetla et al., 2014), a finding we reproduce here, transient  
312 decorrelation of activity between the two pathways has been reported around transitions  
313 between actions in a behavioral sequence (Markowitz et al., 2018). Given our observations  
314 that activity in the two pathways is decorrelated or even anti-correlated during proactive action  
315 suppression, we hypothesize that previously reported transient decorrelations between the  
316 two pathways may arise when the brain must largely suppress the production of actions at  
317 behavioral transitions.

318  
319 The current data also demonstrate distinct contributions of dMSNs and iMSNs in the  
320 DLS to aspects of motor function beyond proactive action suppression. Bradykinesia seen in  
321 PD patients is thought to result primarily from the loss of dopamine neurons in the Substantia  
322 nigra pars compacta (SNc) (Albin et al., 1989). Prior studies have identified that both  
323 dopaminergic input to the striatum and the activity of striatal neurons, in particular dMSNs, are  
324 important for invigorating movement (Panigrahi et al., 2015). However, it was not clear based  
325 on previous work whether iMSN activity is necessary for invigorating movement. Here we  
326 show that inhibiting dMSN activity slowed movement, consistent with previous work, yet this  
327 did not affect which action was selected. Conversely, we show that iMSN inhibition did not  
328 lead to less vigorous movements, but instead disrupted the suppression of actions, and that  
329 this disruption reflected at least some degree of action specificity in iMSN function as it  
330 occurred alongside a change in the likelihood that lateralized actions were produced. Based  
331 on the current data, it remains uncertain the degree to which iMSNs act on specific actions,  
332 although in sensorimotor striatum we might expect iMSNs in a given location to act on actions  
333 involving parts of the body represented in the somatosensory motor cortical areas that provide  
334 input to that striatal location (Hintiryan et al., 2016).

335  
336 At first glance, our results may appear to conflict with studies demonstrating that  
337 optogenetic activation of dMSNs is sufficient to alter action selection. However, sufficiency  
338 does not imply necessity, and our experiments, by inhibiting iMSNs and dMSNs, represent a  
339 test of whether activity in these two cell types is necessary for specific features of behavioral  
340 control. In addition, many of the studies that have demonstrated an effect of optogenetic  
341 activation of dMSNs on action selection have focused on dorso-medial striatum (DMS) (Kravitz  
342 et al., 2012; Tai et al., 2012), and here we focus on DLS. However, our recordings from the  
343 striatum revealed that optogenetic activation of iMSNs or dMSNs in DLS, unlike the  
344 optogenetic inhibition employed in our behavioral experiments, resulted in clear inhibition of  
345 other MSNs (Fig. S4). Thus, behavioral effects of activating dMSNs or iMSNs could potentially  
346 be influenced by inhibition of neurons of the non-targeted MSN class. Careful titration of  
347 optogenetic activation to match physiologically normal ranges of activity might thus represent  
348 a critical improvement on methods for relating the effects of optogenetic activation of targeted  
349 cell types to their normal function during behavior (Coddington and Dudman, 2018).

350  
351 Interestingly, recovery of function in an experimental model of PD has been found to  
352 be associated with a return to near normal levels of iMSN but not dMSN activity, consistent  
353 with some degree of primacy for the indirect pathway in action production (Parker et al., 2018).  
354 Together with the data presented here, these results suggest the intriguing possibility that the  
355 indirect pathway provides an inhibitory “mask”, specifying which actions not to produce, while  
356 the direct pathway provides a gain signal, as opposed to an action selection signal (Mink,  
357 1996), for commands that are pushed through the mask. In this view, the selective function of



358 the sensorimotor BG circuits on actions can be predominantly produced through the indirect  
359 pathway, a novel proposal that should serve as a basis for future experiments. In the present  
360 data, both pathways were more active around movements toward the contralateral side of the  
361 recording site (Figure S8), suggesting that suppressing and promoting signals may be  
362 targeted towards nearby regions in the space of possible actions, perhaps in part by  
363 mechanisms in other brain systems such as the cortex, thalamus, and cerebellum (Mink, 1996;  
364 Park et al., 2020).

365  
366 Here we focus on MSNs in the dorsolateral striatum, sometimes termed sensorimotor  
367 striatum due to the preponderance of inputs from sensory and motor cortical areas that  
368 terminate there (Hintiryan et al., 2016; Hunnicutt et al., 2016; Wall et al., 2013). Though we  
369 targeted this specific region, our measure of neural activity, as in other studies employing  
370 photometry, pooled within a class of MSNs with likely diverse tuning properties. While previous  
371 work has identified correlations between MSN firing and kinematic or motivational variables  
372 (Klaus et al., 2017; Lau and Glimcher, 2007; Markowitz et al., 2018; Rueda-Orozco and  
373 Robbe, 2015), the lack of conclusive information regarding the tuning properties of individual  
374 MSNs has been a recurring issue in efforts to determine the functional importance of the direct  
375 and indirect pathways. For example, experiments might well be blind to functional organization  
376 wherein neurons in the two pathways controlling specific actions produce anti-correlated  
377 activity, because the granularity with which actions are encoded by striatal neurons, and  
378 resultantly, how to design a behavioral scenario that would isolate these representations, is  
379 beyond current understanding.

380  
381 We were able to circumvent the general problem of diverse and unknown selectivity of  
382 neurons in two ways. First, by training animals to remain immobile for an extended period in  
383 the task, we pushed the brain toward suppressing the majority of actions, a behavioral  
384 manipulation we hypothesized to have a common effect on the neurons in a given cell class  
385 regardless of their selectivity for actions. Second, the striatum in a given hemisphere shows  
386 enhanced functional involvement in contralateral movements (Kravitz et al., 2010; Schwarting  
387 and Huston, 1996). By training animals to perform a task wherein the relative value of left/right  
388 lateralized movements was varied over time during a prolonged period of action suppression,  
389 and observing or manipulating activity on one hemisphere at a time, we demonstrate a circuit  
390 mechanism by which dorso-lateral striatal circuits of the BG can control generalized movement  
391 vigor or the suppression of actions.

392  
393 Adaptive behavior fundamentally involves the interplay of action promoting and action  
394 suppressing mechanisms. The data presented here demonstrate that in sensorimotor  
395 striatum, elements of the direct and indirect BG pathways can express opposite patterns of  
396 modulation and be required for generally opponent yet distinct promoting and suppressing  
397 aspects of motor function. Knowledge of how circuits in other regions of the striatum, the BG  
398 at large, or elsewhere in the brain mediate this interplay represents a critical avenue toward a  
399 fundamental understanding of animal behavior. Such knowledge also has the potential to  
400 inform the engineering of artificial systems that can behave appropriately in complex  
401 environments, as well as a mechanistic understanding and the design of effective therapies  
402 for neurological and neuropsychiatric disease.

403  
404  
405 **Data availability statement:** The data and analysis code that support the findings of this

406 study are available from the corresponding author upon reasonable request.

407 **Acknowledgements:** We would like to thank Brian Lau, John Krakauer, and Bassam  
408 Atallah for comments on versions of the manuscript and the entire Paton lab for feedback  
409 during the course of this project. We would also like to thank the ABBE Facility and the  
410 Scientific Hardware, Histopathology and Rodent Champalimaud Research Platforms for  
411 unparalleled technical assistance, and Ben Zarov and Daniela Domingues for helping with the  
412 training of some of the animals included in this study. This work was developed with the  
413 support from the research infrastructure Congento, co-financed by Lisboa Regional  
414 Operational Programme (Lisboa2020), under the PORTUGAL 2020 Partnership Agreement,  
415 through the European Regional Development Fund (ERDF) and Fundação para a Ciência e  
416 Tecnologia (Portugal) under the project LISBOA-01-0145-FEDER-022170. The work was  
417 funded by an HHMI International Research Scholar Award to J.J.P. (#55008745), European  
418 Research Council Consolidator grant (#DYCOCIRC - REP-772339-1) to J.J.P., a Bial bursary  
419 for scientific research to J.J.P. (#193/2016), internal support from the Champalimaud  
420 Foundation, and a PhD fellowship (PD/BD/105945/2014) from Fundação para a Ciência e a  
421 Tecnologia to B.F.C.

422 **Author contributions:** J.J.P. and B.F.C. conceived of the experiments and wrote  
423 the manuscript. S.S. assisted in analysis of the fiber photometry data and revised the  
424 manuscript. B.F.C. carried out all experiments and analyzed the data. J.J.P. supervised all  
425 aspects of the project.

426 **Competing interests:** The authors declare no competing financial interests.

427 **Methods**

428

429 **Key Resources Table:**

430

| Reagent or Resource                                  | Source                                  | Identifier                                                          |
|------------------------------------------------------|-----------------------------------------|---------------------------------------------------------------------|
| <b>Antibodies</b>                                    |                                         |                                                                     |
| Rabbit Anti-GFP                                      | Invitrogen                              | Cat# A-6455                                                         |
| Mouse Anti-mCherry                                   | abcam                                   | Cat# ab125096                                                       |
| <b>Bacterial and Virus Strains</b>                   |                                         |                                                                     |
| AAV1-Syn-Flex-GCaMP6f                                | University of Pennsylvania Vector Core  | N/A                                                                 |
| AAV1-CAG-Flex-tdTomato                               | University of Pennsylvania Vector Core  | N/A                                                                 |
| AAV5-CAG-FLEX-ArchT-tdTomato                         | Addgene                                 | Cat# 28305                                                          |
| AAV9-EF1a-double floxed-hChR2(H134R)-EYFP-WPRE-HGHpA | Addgene                                 | Cat# 20298                                                          |
| <b>Experimental Models: Organisms/Strains</b>        |                                         |                                                                     |
| D1-Cre mouse line (EY217)                            | (Gerfen et al., 2013)                   | N/A                                                                 |
| A2a-Cre mouse line (KG139)                           | (Gerfen et al., 2013)                   | N/A                                                                 |
| Ai32(RCL-ChR2(H134R)/EYFP) mouse line                | (Madisen et al., 2012)                  | N/A                                                                 |
| <b>Software and Algorithms</b>                       |                                         |                                                                     |
| MATLAB                                               | MathWorks                               | <a href="https://www.mathworks.com/">https://www.mathworks.com/</a> |
| Python3                                              | Python                                  | <a href="https://www.python.org/">https://www.python.org/</a>       |
| R                                                    | The R Project for Statistical Computing | <a href="https://www.r-project.org/">https://www.r-project.org/</a> |

|                             |                                                                                   |                                                                                                                               |
|-----------------------------|-----------------------------------------------------------------------------------|-------------------------------------------------------------------------------------------------------------------------------|
| Bonsai                      | (Lopes et al., 2015)                                                              | <a href="https://bonsai-rx.org/">https://bonsai-rx.org/</a>                                                                   |
| Kilosort2                   | (Pachitariu et al.)                                                               | <a href="https://github.com/MouseLand/Kilosort2">https://github.com/MouseLand/Kilosort2</a>                                   |
| Phy GUI                     | <a href="https://github.com/cortex-lab/phy">https://github.com/cortex-lab/phy</a> | <a href="https://github.com/cortex-lab/phy">https://github.com/cortex-lab/phy</a>                                             |
| R Package <i>Ime4</i>       | (Bates et al., 2015)                                                              | <a href="https://cran.r-project.org/web/packages/Ime4/index.html">https://cran.r-project.org/web/packages/Ime4/index.html</a> |
| <b>Other</b>                |                                                                                   |                                                                                                                               |
| Behavior Apparatus          | This paper                                                                        | All designs available upon request                                                                                            |
| Photometry setup            | Adapted from (Soares et al., 2016)                                                | N/A                                                                                                                           |
| Silicon Probe + Optic fiber | Cambridge Neurotech                                                               | ASSY 77-H2                                                                                                                    |
| OpenEphys Acquisition Board | (Siegle et al., 2017)                                                             | <a href="https://open-ephys.org/acq-board">https://open-ephys.org/acq-board</a>                                               |

431

432

## Animals:

433

434

435

436

437

438

439

440

Adult (over 2 months) male and female mice of A2a:cre (KG139) and D1:cre (EY217) lines (Gerfen et al., 2013) were used for this study under the protocol approved by the Champalimaud Foundation Animal Welfare Body (Protocol Number: 2017/013), the Portuguese Veterinary General Board (Direcção-Geral de Veterinária, project approval 0421/000/000/2018) and in accordance with the European Union Directive 2010/63/EEC. Mice were group housed prior to surgical procedures and singly housed following surgery in an inverted 12h dark/light cycle. Mice were maintained under water deprivation for all behavioral experiments (>80% body weight from baseline ad libitum period before deprivation).

441

## Behavioral apparatus:

442

443

444

445

446

447

448

449

450

451

The behavioral box (20 x 17 x 19 cm), contained 3 nose ports and a speaker. The behavioral box consisted of 3 front walls (135 degree angle between the center and the side walls) 2 side walls and a back wall with a 90 degree angle between them. Each of the three front walls contained a nose port equipped with an infrared emitter/sensor pair to access port entry and exit times. The central nose port was defined as the trial initiation port, and choices were reported at the lateral nose ports. For correct trials, a 4-6  $\mu$ L calibrated water reward was delivered using a solenoid valve. Tones were delivered through a speaker mounted on the center wall. All sensors and effectors in the behavioral box were read and controlled using a microprocessor (Arduino Mega 2560, Arduino) via a custom circuit board. The task was implemented by the microprocessor, which outputted data via a serial communication port to

452 a desktop computer running custom Python-based software. High-speed video was acquired  
453 at 120fps and 640\*480 pixel resolution (FL3-U3-13S2, FLIR).  
454

## 455 Behavioral task:

456 Mice were trained to categorize interval durations as either short or long by performing  
457 right and left choices as previously described in (Soares et al., 2016). Briefly, mice self-initiated  
458 trials by entering the central nose port, triggering the delivery of a pair of tones (7,500 Hz, 150  
459 ms) separated by one of 6 randomly uniformly sampled selected intervals (0.6, 1.05, 1.26,  
460 1.74, 1.95 and 2.4 s or 0.6, 1.26, 1.38, 1.62, 1.74, and 2.4 s. Stable performance was usually  
461 achieved after 3-4 months of training. Trial availability was not signaled to the animal but inter-  
462 trial onset interval was kept constant within each animal (7-8 s). Thus, initiation port entries  
463 before the point that a trial became available were ineffectual. After the first tone was  
464 presented, mice were required to maintain interruption of the center nose port IR beam until  
465 the second tone was delivered, we refer to this action as “fixation” throughout the text. If the  
466 mouse departed the port before the second tone, an error tone (150ms of white noise) was  
467 played and the next trial availability delayed (timeout). We refer to these trials as “broken  
468 fixations”. To prevent incorrectly flagging trials as broken fixations due to short sporadic state  
469 transitions in the IR beam, we only counted a trial as broken fixation after the beam had been  
470 continuously uninterrupted for 50 ms. After both tones were played, mice reported their  
471 judgments by entering one of the two laterally located nose ports over the next 10 seconds.  
472 For intervals shorter than a 1.5 s category boundary, responses were reinforced at one of the  
473 lateral ports. For intervals longer than 1.5 s, responses were reinforced at the opposite port.  
474 Incorrect responses were followed by a white noise burst (150 ms) and a timeout (12-18s  
475 inter-trial onset interval). The short/long vs right/left contingencies were counterbalanced  
476 across animals. Therefore, we adopt the nomenclature of Contra-short/Contra-long  
477 hemisphere throughout the paper. Sessions typically lasted 2 hours.

478 Psychometric functions were fit using a 4-parameter logistic function:

$$P(x) = (u - l) \times \frac{e^{\frac{x-b}{s}}}{1 + e^{\frac{x-b}{s}}} + l,$$

479 where  $P$  is the performance of the animal on interval  $x$ ,  $u$  and  $l$  the upper and lower  
480 asymptote of the curve, respectively,  $b$  the bias parameter and  $s$  the slope parameter.  
481 Sessions wherein overall performance, was below 70% were excluded for any further  
482 analysis.  
483

484  
485 Unless otherwise stated, broken fixations before the earliest interval (0.6s) were  
486 excluded from analysis, as these often reflected the failure of animals to properly settle in the  
487 initiation port.

488 To calculate hazard of breaking fixation at a particular time bin in trial,  $H(k)$ , we used  
489 the following equation:

$$H(k) = \frac{B(k)}{\sum_{j=k}^T B(j) + \sum_{j=k}^T C(j)}, \quad t < k < t + \Delta t$$

490  
491  
492



493 where  $B(k)$  is the number of broken fixations that occurred at time bin  $k$ ,  $\sum_{j=k}^T B(j)$   
494 the sum of all broken fixations that occurred in the time bins greater or equal to  $k$ , up until the  
495 longest possible interval  $T$  (2.4 seconds), and  $\sum_{j=k}^T C(j)$  the sum of all completed trials  
496 that occurred from time bin  $k$  until  $T$ .  
497

## 498 Viral injections and fiber implantation:

499  
500 All surgeries were performed with mice under isoflurane anesthesia (1-2% at 0.8  
501 L/min). We stereotaxically targeted the dorsolateral striatum (DLS, coordinates below)  
502 bilaterally for all viral deliveries.

503 After achieving stable performance (usually >3 months), mice were allowed to regain  
504 baseline weight and were subject to viral injection and fiber implantation in the same surgery.  
505 Mice health was assessed daily and after at least 5 days, the water deprivation regime was  
506 reinstated. To make sure subjects recovered their pre-surgery performance before data  
507 collection sessions (photometry or optogenetics), they were gradually retrained in the task  
508 without and then with fibers attached. Upon reaching stable performance (1-2 weeks), data  
509 collection began. We alternated recorded/manipulated hemisphere every day.

510 For fiber photometry experiments, we injected 300nL of a mixture of two viruses:  
511 AAV1-Syn-Flex-GCaMP6f (titer  $\sim 1 \times 10^{13}$  gc/mL; University of Pennsylvania Vector Core)  
512 and AAV1-CAG-Flex-tdTomato (titer  $\sim 0.5 \times 10^{12}$  gc/mL; University of Pennsylvania Vector  
513 Core), at a 5:1 ratio, in DLS striatum (single injection, AP 0.5mm, ML 2.1mm, DV 2.6mm from  
514 pia) using an automated microprocessor controlled microinjection pipette with micropipettes  
515 pulled from borosilicate capillaries (Nanoject II, Drummond Scientific). Injections were  
516 performed at 0.2 Hz with 2.3 nL injection volumes per pulse. For all injections, the micropipette  
517 was kept at the injection site 10 min before withdrawal. After injection, we implanted,  
518 bilaterally, 2 fibres (MFC\_200/245-0.53\_ZF1.25(G)\_FLT, DORIC LENSES) 200  $\mu$ m above the  
519 injection site.

520 For optogenetic inhibition experiments, we injected AAV5-CAG-FLEX-ArchT-  
521 tdTomato (titer  $10^{13}$  gc/mL, Addgene) in the DLS. For each hemisphere, we made two  
522 injections (500nL, AP 0.5mm, ML 2.1mm, DV 2.7mm and 3.1mm from bregma) and implanted  
523 one fibre (Lambda-B fibre 200um core, 0.39NA, 1.5mm emitting length, Optogenix) near the  
524 injection site (AP 0.5mm, ML 2.1mm, DV 3.5mm from bregma) .  
525  
526

## 527 Fiber photometry

528 The photometry apparatus was adapted from (Matias et al., 2017). For all experiments,  
529 a single blue laser was coupled to a patchcord (100  $\mu$ m core diameter, 0.22 NA) and  
530 connected to a collimator adapter (EFL 4.5 mm, NA 0.50) and a neutral density filter. Dichroic  
531 mirrors were fixed inside the main unit, allowing for 473 nm light delivery and GCaMP6f and  
532 tdTomato fluorescence detection. The 473 nm light was coupled into a patchcord (200  $\mu$ m  
533 core diameter, 0.48 NA) using a lens (EFL 4.5 mm, NA 0.50) and a rotatory joint. The  
534 patchcord was mated to one of two chronically implanted optical fibers (200  $\mu$ m core diameter,  
535 0.48 NA). Laser intensities at the patchcord tip, before mating to the chronically-implanted

536 fiber, were 15-40 $\mu$ W. For detection of GCaMP6f fluorescence, light was collected by the lens,  
537 transmitted and reflected by the dichroics before final filtering and focusing into a  
538 photodetector. For detection of tdTomato fluorescence, light was collected by the lens and  
539 transmitted through all dichroics before final filtering and focusing into a second photodetector.  
540 Photodetector output was digitized at 1 kHz (PCIe 6351, National Instruments) and recorded  
541 using custom software in Bonsai (Lopes et al., 2015).

## 542 Fiber photometry data analysis

543 All photometry data analysis was performed with custom MATLAB software. Raw data  
544 was downsampled to 100Hz and low-pass filtered at 20Hz. Slow fluctuations were removed  
545 by subtracting a fitted polynomial to the raw signal (order < 5). For each session,  $\Delta F/F$  was  
546 calculated for both channels as  $\Delta F/F_t = (F_t - F_0) / F_0$ , where  $F_0$  was calculated as the 10th lower  
547 percentile from the filtered signal. Similarly to (Soares et al., 2016), robust regression using  
548 GCaMP6f and tdTomato  $\Delta F/F$  was performed and the coefficient estimates were used to  
549 calculate a predicted GCaMP6f  $\Delta F/F$  based on the observed tdTomato  $\Delta F/F$ . This predicted  
550 GCaMP6f  $\Delta F/F$  was then subtracted to the observed GCaMP6f  $\Delta F/F$  to calculate the corrected  
551  $\Delta F/F$ . In order to compare across sessions, each session's corrected  $\Delta F/F$  was z-scored using  
552 the mean and standard deviation calculated from a baseline period (5 to 2 seconds before trial  
553 onset). Signals for individual trials were then re-zeroed by subtracting the average of a period  
554 of 5 to 2 seconds before trial onset.

555 In order to compare the rate of change of activity aligned to broken fixations to time-  
556 matched valid trials (Fig. S3c-d) we began by calculating the first derivative of the corrected  
557  $\Delta F/F$  for each trial. For each broken fixation trial, we aligned the trace to the timestamp of the  
558 broken fixation and, in order to compare to a time-matched valid trial, we cropped the average  
559 trace of all valid trials to the same length and aligned to the time of the broken fixation. We  
560 repeated this process for all broken fixation trials.

561

## 562 Acute recordings

563 To confirm the ability to inhibit medium spiny neurons, we performed acute recordings  
564 in the dorsal striatum of untrained animals. Briefly, similarly to trained animals, we virally  
565 expressed ArchT in D1-Cre or A2a-Cre animals. After 3-5 weeks of viral expression, we  
566 implanted a small headpost and a ground pin contralateral to the recorded hemisphere. After  
567 allowing animals to recover, a small round craniotomy (1.5mm diameter) was opened over the  
568 same coordinates as the virus injection. Recordings were performed while animals were head-  
569 restrained using custom built headbar holders and on top of a passively rotatable cylinder.

570 A silicon probe (ASSY 77-H2, Cambridge NeuroTech) with a tapered optical fibre,  
571 identical to the one used for optogenetic inhibition during behavior, glued to the back was  
572 slowly lowered into dorsal striatum. Electrophysiology and laser modulation data were  
573 acquired at 30kHz with OpenEphys hardware (Siegle et al., 2017) and Bonsai (Lopes et al.,  
574 2015).

575 Every 10 to 25 seconds, an interval was drawn from the set [0.60,1.05,1.95, 2.40]s  
576 and light was continuously delivered during that duration. The range of power used was  
577 identical to that used during the task and, similarly, was ramped off for 250ms after the drawn  
578 delay had elapsed.

579 In a second batch of animals, we tested the extent of excitation and inhibition when  
580 activating medium spiny neurons using ChR2. To achieve ChR2 expression we virally  
581 expressed ChR2 (AAV9-EF1a-double floxed-hChR2(H134R)-EYFP-WPRE-HGHpA,  
582 Addgene) or we used double transgenic mice (A2a-Cre or D1-Cre crossed with Ai32 mouse  
583 line (Madisen et al., 2012)). Light intensity was set to 0.5-1mW at the end of the fiber. The  
584 remainder of the protocol was identical.

585 Electrophysiology data was sorted using Kilosort2 ([github.com/MouseLand/Kilosort2](https://github.com/MouseLand/Kilosort2))  
586 and manually curated using Phy ([github.com/cortex-lab/phy](https://github.com/cortex-lab/phy)).

587 Cells that fired, on average, less than 1 / 2.4 spikes/s (detection limit during inhibition)  
588 during the baseline were excluded from analysis.

589 To determine if a cell was modulated, we compared the firing rate in a baseline period  
590 prior to light delivery (-3 to -1s) to the average firing rate during the stimuli. We computed a t-  
591 test per cell and considered whether a cell was significantly modulated after correcting for  
592 multiple comparisons ( $p < 0.05 / (\text{Total number of recorded units})$ ).

593 To classify units as putative medium spiny neurons we used previously described  
594 criteria (Benhamou et al., 2014; Yael et al., 2013) based on firing statistics and waveform  
595 duration. Briefly, we classified units as putative medium spiny neurons if baseline firing rate  
596 was less than 10Hz, coefficient of variation greater than 1.5 and waveform duration greater  
597 than 600ms.

## 598 Optogenetic manipulations during task performance:

599 A 556nm laser (500mW, Optoelectronics Technology) was used as a light source to  
600 activate ArchT. Briefly, the output of the laser was aligned to an acousto-optic modulator (AOM  
601 MTS110-A3-VIS, AA OPTO-ELECTRONIC) and fibre launched into a patchcord (200  $\mu\text{m}$  core,  
602 0.48NA). The output of the patchcord was then connected to a power splitting rotary joint  
603 (FRJ\_1x2i\_FC-2FC\_0.5, DORIC) and finally into 1 or 2 patch cords (200  $\mu\text{m}$  core, 0.48NA)  
604 that connected to the animal's implanted tapered fibres (Lambda-B fibre 200 $\mu\text{m}$  core, 0.39NA,  
605 1.5mm emitting length, Optogenix).

606 The light intensity was controlled by modulating the AOM using a dedicated Arduino  
607 Mega 2560 board connected to a DAC board (MCP4725, Sparkfun). Regardless of the  
608 stimulation duration, all protocols included a 250ms linear ramping off, designed to reduce the  
609 potential for rebound excitation (Chuong et al., 2014).

610 The inhibition protocol was applied on a randomly selected 30% of trials. Light was  
611 continuously delivered, with the onset aligned to the initiation of a trial (centre nose port) and  
612 lasting until second-tone delivery or the exit of the subject from the centre-poke, whichever  
613 occurred first. For all analyses of optogenetic manipulation data, the first 15 trials of each  
614 session were excluded. Laser power was set to be 23 to 31mW at the end of the fibre for all  
615 animals.

616 For a subset of direct pathway animals ( $n=3$ , Fig. S5), a third protocol was used  
617 wherein light was turned at termination of the second tone up until choice or 400ms, whichever  
618 occurred first.

619 Each day, we changed the location of the inhibition (CS or CL,  $n=4$  A2a-cre,  $n=6$  D1-  
620 cre) and, after collecting data from the unilateral manipulation conditions, we silenced both  
621 hemispheres simultaneously ( $n=4$  A2a-Cre and  $n=4$  D1-Cre). Data from 4/6 and 3/5 D1 and  
622 A2a-Cre animals was acquired for all conditions (i.e. unilateral and bilateral). For single  
623 animals, unless otherwise stated, all analyses were performed by concatenating all trials from  
624 all sessions of the same manipulation condition.

625 To calculate the fraction of trials wherein animals broke fixation as a function of time,  
626 in control versus manipulated trials (i.e. Fig. 4h-i and Fig. 5e-f), we took for each condition all  
627 trials wherein animals broke fixation after 0.6s and calculated their probability density as a  
628 function of time over all trials of that condition (control vs manipulated).  
629

## 630 Movement trajectories

631  
632 Offline markerless tracking of mouse position was performed using DeepLabCut  
633 targeting the nape of each animal (Mathis et al., 2018). Data was further smoothed with a  
634 100ms (12 frames) median filter.

635 To compare trajectories between different conditions (Fig. S7), we first computed a  
636 null distribution of integrated euclidean distances over time within a reference condition (non-  
637 stimulated broken fixation condition), using all pairwise trial combinations. We then compared  
638 pairs of trials where one trial was taken from a test condition, and the other from the reference  
639 condition, for all pairwise combinations, resulting in a distribution of integrated euclidean  
640 distances between reference and test trials. To compute distances between positions from  
641 trials of differing duration, the longer trial of the pair was cropped to match the duration of the  
642 shorter. To compare across trial pairs of different duration, we normalized euclidean distances  
643 by trial duration, resulting in a measure of the average euclidean distance between reference  
644 and test trial per unit time. We then computed for each animal an area under the receiver  
645 operating characteristic curve (auROC), and asked whether the distribution of auROCs was  
646 significantly different from 0.5 using a two-tailed t-test.  
647

## 648 Statistics

649 Statistical analyses were done using MATLAB and R. Unless otherwise stated, we  
650 used mixed effects models to test for fixed effects across experiments while specifying random  
651 intercepts per animal implemented using the R package *lme4* (Bates et al., 2015) using data  
652 from relevant single trials. To test the significance of relevant main effects, we report Anova  
653 F-statistics with Satterthwaite adjusted degrees of freedom for the linear mixed models and  
654 Wald chi-squared tests for the generalized linear mixed models. We report marginal means  
655 and post hoc contrasts (t-statistics), with Tukey correction for multiple comparisons, using the  
656 R package *emmeans* (Lenth, 2016; Searle et al., 1980) as (Effect Size + 95%[CI], p-value)  
657 throughout the paper. Summary of comparisons along with additional details is included in  
658 Supplemental Table 1. All tests are two-tailed, unless otherwise stated in the Supplemental  
659 Table 1.

## 660 Immunohistochemistry and microscopy:

661 Histological analysis was performed after all experiments to confirm optical fiber  
662 placement and expression patterns of transgenes. Mice were administered with a lethal dose  
663 of pentobarbital (Eutasil, 100 mg/kg intraperitoneally) and perfused transcardially with 4%  
664 paraformaldehyde. The brains were removed from the skull, stored for 24 hours in 4%  
665 paraformaldehyde, and then kept in PBS until sectioning. A vibratome or cryostat was used to

666 section the brain into 50 or 40  $\mu\text{m}$  thick slices that were then immunostained with antibodies  
667 against GFP (A-6455, 1:1000, Invitrogen) and tdTomato (ab125096, 1:1000, abcam). Finally,  
668 all slices were incubated in DAPI. Images were acquired with a confocal microscope (LSM  
669 710, ZEISS) or a slide scanner (Axio Scan.Z1,ZEISS).



670 Supplemental Information

671 Supplemental Table 1

672 Summary of linear mixed model comparisons.  
673

| Figure | Formula (Wilkinson Notation)          | Test                                                                                                                                                                                                                                                                                                                                                            | Reported Relevant Independent Variable or Contrast | Dependent variable           | Effect size (Effect[95%CI])                    | Statistic              | P-value (corrected) | # Mice         |
|--------|---------------------------------------|-----------------------------------------------------------------------------------------------------------------------------------------------------------------------------------------------------------------------------------------------------------------------------------------------------------------------------------------------------------------|----------------------------------------------------|------------------------------|------------------------------------------------|------------------------|---------------------|----------------|
| 2h-i   | Genotype*Hemisphere + (1 Animal)      | Linear mixed effects model to test whether the activity during the delay period (averaging the activity of the longest trial of 2.4seconds from 0.6 to 2.4 seconds) in the indirect pathway is greater than in the direct pathway. Additionally, if the activity of the two pathways is significantly different at trial initiation (averaging from 0 to 0.6s). |                                                    |                              |                                                |                        |                     |                |
|        |                                       | One-tailed Post-Hoc, Tukey correction                                                                                                                                                                                                                                                                                                                           | Genotype (iMSN > dMSN), averaged over Hemisphere   | Mean $\Delta F/F$ [0.6:2.4s] | 0.749[-0.065,1.56] (Average d over hemisphere) | t(12.5) = 2.004        | 0.0341              | 8 iMSN, 6 dMSN |
|        |                                       | One-tailed Post-Hoc, Tukey correction                                                                                                                                                                                                                                                                                                                           | Genotype (iMSN vs dMSN)                            | Mean $\Delta F/F$ [0:0.6]    | 0.102[-1.11,1.31] (Average d over hemisphere)  | t(12.1) = 0.034        | 0.8573              | 8 iMSN, 6 dMSN |
| 3c     | Genotype*Hemisphere + (1 Animal)      | Linear mixed effects model to test difference in activity between the period before and after the decision boundary. We took the average activity in the period before the 1.5s decision boundary [0.6:1.5] and after the decision boundary [1.5,2.4], for each longest interval trial (2.4s) and used its difference as a dependent variable.                  |                                                    |                              |                                                |                        |                     |                |
|        |                                       | Mixed Anova with Satterthwaite's approximated d.f.                                                                                                                                                                                                                                                                                                              | Genotype:Hemisphere                                | Mean $\Delta F/F$            |                                                | F(1, 10.953) = 22.28   | <0.001              | 8 iMSN, 6 dMSN |
|        |                                       | Post-Hoc, Tukey correction                                                                                                                                                                                                                                                                                                                                      | iMSN:CL vs 0                                       |                              | 0.4228[0.006, 0.840]                           | t(12.5)=2.949          | 0.0462              |                |
|        |                                       | Post-Hoc, Tukey correction                                                                                                                                                                                                                                                                                                                                      | dMSN:CL vs 0                                       |                              | -0.5354[-1.017,-0.054]                         | t(12.5)=-3.265         | 0.0272              |                |
|        |                                       | Post-Hoc, Tukey correction                                                                                                                                                                                                                                                                                                                                      | iMSN:CS vs 0                                       |                              | -0.1043[-0.521, 0.313]                         | t(12.5)=-0.430         | 0.9275              |                |
|        |                                       | Post-Hoc, Tukey correction                                                                                                                                                                                                                                                                                                                                      | dMSN:CS vs 0                                       |                              | -0.0395[-0.521,0.442]                          | t(12.5)=-0.212         | 0.9988              |                |
| 4f,5c  | Genotype*Hemisphere*Laser+ (1 Animal) | Generalized linear mixed-model for the probability of breaking fixation of a given trial as a function of Genotype, Hemisphere and manipulation. Contrasts are reported as odds ratios.                                                                                                                                                                         |                                                    |                              |                                                |                        |                     |                |
|        |                                       | Wald chi-square test                                                                                                                                                                                                                                                                                                                                            | Genotype:Hemisphere:Laser                          | Broken Fixation ~[0,1]       |                                                | $X^2_{(2)} = 169.5609$ | <10 <sup>-4</sup>   | 6dMSN, 4iMSN   |

|       |                                                       |                                                                                                                                                                                                                                                                            |       |                                                   |                        |                        |                                         |                   |              |
|-------|-------------------------------------------------------|----------------------------------------------------------------------------------------------------------------------------------------------------------------------------------------------------------------------------------------------------------------------------|-------|---------------------------------------------------|------------------------|------------------------|-----------------------------------------|-------------------|--------------|
|       |                                                       | Post-Hoc, correction                                                                                                                                                                                                                                                       | Tukey | iMSN:Bilateral:LaserOff vs iMSN:Bilateral:LaserOn |                        | 0.0585[0.0362, 0.0945] | t(asymp) = -19.361                      | <10 <sup>-4</sup> | 4            |
|       |                                                       | Post-Hoc, correction                                                                                                                                                                                                                                                       | Tukey | iMSN:CL:LaserOff vs iMSN:CL:LaserOn               |                        | 0.7510[0.5784, 0.9750] | t(asymp) = -3.584                       | 0.0176            | 4            |
|       |                                                       | Post-Hoc, correction                                                                                                                                                                                                                                                       | Tukey | iMSN:CS:LaserOff vs iMSN:CS:LaserOn               |                        | 0.6245[0.4809, 0.8110] | t(asymp) = -5.888                       | <10 <sup>-4</sup> | 4            |
|       |                                                       | Post-Hoc, correction                                                                                                                                                                                                                                                       | Tukey | dMSN:Bilateral:LaserOff vs dMSN:Bilateral:LaserOn |                        | 0.8177[0.6271, 1.0664] | t(asymp) = -2.477                       | 0.3544            | 4            |
|       |                                                       | Post-Hoc, correction                                                                                                                                                                                                                                                       | Tukey | dMSN:Bilateral:LaserOff vs dMSN:Bilateral:LaserOn |                        | 0.9052[0.7121, 1.1505] | t(asymp) = -1.358                       | 0.9712            | 6            |
|       |                                                       | Post-Hoc, correction                                                                                                                                                                                                                                                       | Tukey | dMSN:Bilateral:LaserOff vs dMSN:Bilateral:LaserOn |                        | 0.8687[0.6801, 1.1096] | t(asymp) = -1.879                       | 0.7723            | 6            |
| 4g,5e | Genotype*Hemisphere*Laser+ (1 Animal)                 | Generalized linear mixed-model for the probability of breaking fixation of a given trial as a function of Genotype, Hemisphere(CS or CL), and manipulation, split by the time of broken fixation relative to the decision boundary. Contrasts are reported as odds ratios. |       |                                                   |                        |                        |                                         |                   |              |
|       | Broken fixations BEFORE the decision boundary (<1.5s) | Wald test                                                                                                                                                                                                                                                                  |       | Genotype:Hemisphere:Laser                         | Broken Fixation ~[0,1] |                        | X <sup>2</sup> <sub>(1)</sub> = 9.9902  | 0.0016            | 6dMSN, 4iMSN |
|       |                                                       | Post-Hoc, correction                                                                                                                                                                                                                                                       | Tukey | iMSN:CL:LaserOff vs iMSN:CL:LaserOn               |                        | 0.409[0.283, 0.589]    | t(asymp) = -7.41                        | <10 <sup>-4</sup> | 4            |
|       |                                                       | Post-Hoc, correction                                                                                                                                                                                                                                                       | Tukey | iMSN:CS:LaserOff vs iMSN:CS:LaserOn               |                        | 0.904[0.608, 1.342]    | t(asymp) = -0.776                       | 0.9943            | 4            |
|       |                                                       | Post-Hoc, correction                                                                                                                                                                                                                                                       | Tukey | dMSN:CL:LaserOff vs dMSN:CL:LaserOn               |                        | 1.046[0.724, 1.511]    | t(asymp) = 0.370                        | 1.0000            | 6            |
|       |                                                       | Post-Hoc, correction                                                                                                                                                                                                                                                       | Tukey | dMSN:CS:LaserOff vs dMSN:CS:LaserOn               |                        | 1.054[0.719, 1.544]    | t(asymp) = 0.414                        | 0.9999            | 6            |
|       | Broken fixations AFTER the decision boundary (>1.5s)  | Wald test                                                                                                                                                                                                                                                                  |       | Genotype:Hemisphere:Laser                         | Broken Fixation ~[0,1] |                        | X <sup>2</sup> <sub>(1)</sub> = 12.9339 | 0.0003            | 6dMSN, 4iMSN |
|       |                                                       | Post-Hoc, correction                                                                                                                                                                                                                                                       | Tukey | iMSN:CL:LaserOff vs iMSN:CL:LaserOn               |                        | 1.060[0.748, 1.501]    | t(asymp) = 0.503                        | 0.9997            | 4            |
|       |                                                       | Post-Hoc, correction                                                                                                                                                                                                                                                       | Tukey | iMSN:CS:LaserOff vs iMSN:CS:LaserOn               |                        | 0.485[0.349, 0.674]    | t(asymp) = -6.655                       | <10 <sup>-4</sup> | 4            |
|       |                                                       | Post-Hoc, correction                                                                                                                                                                                                                                                       | Tukey | dMSN:CL:LaserOff vs dMSN:CL:LaserOn               |                        | 0.734[0.530, 1.018]    | t(asymp) = -2.868                       | 0.0791            | 6            |

|           |                                        |                                                                                                                                                                                                                                                                                                                      |       |                                       |                          |                      |                         |            |                |
|-----------|----------------------------------------|----------------------------------------------------------------------------------------------------------------------------------------------------------------------------------------------------------------------------------------------------------------------------------------------------------------------|-------|---------------------------------------|--------------------------|----------------------|-------------------------|------------|----------------|
|           |                                        | Post-Hoc, correction                                                                                                                                                                                                                                                                                                 | Tukey | dMSN:CS:Laser Off vs dMSN:CS:Laser On |                          | 0.739[0.533, 1.026]  | t(asymp) = 2.796        | 0.0958     | 6              |
| 4j,5g     | Genotype*Hemisphere*Lasers+ (1 Animal) | Generalized linear mixed-model testing the probability of reporting a long choice after breaking fixation, as a function of Genotype, Hemisphere and manipulation. Contrasts are reported as odds ratios.                                                                                                            |       |                                       |                          |                      |                         |            |                |
|           |                                        | Wald test                                                                                                                                                                                                                                                                                                            |       | Genotype:Hemisphere:Lasers            | Choice "long" ~[0,1]     |                      | $X^2_{(1)} = 40.4507$   | $<10^{-4}$ | 6dMSN, 4iMSN   |
|           |                                        | Post-Hoc, correction                                                                                                                                                                                                                                                                                                 | Tukey | iMSN:CL:LaserOff vs iMSN:CL:LaserOn   |                          | 0.257[0.1430, 0.463] | t(asymp) = -7.003       | $<10^{-4}$ | 4              |
|           |                                        | Post-Hoc, correction                                                                                                                                                                                                                                                                                                 | Tukey | iMSN:CS:LaserOff vs iMSN:CS:LaserOn   |                          | 3.369[1.7069, 6.651] | t(asymp) = 5.414        | $<10^{-4}$ | 4              |
|           |                                        | Post-Hoc, correction                                                                                                                                                                                                                                                                                                 | Tukey | dMSN:CL:LaserOff vs dMSN:CL:LaserOn   |                          | 0.917[0.4484, 1.875] | t(asymp) = -0.368       | 1.000      | 6              |
|           |                                        | Post-Hoc, correction                                                                                                                                                                                                                                                                                                 | Tukey | dMSN:CS:LaserOff vs dMSN:CS:LaserOn   |                          | 0.737[0.3782, 1.438] | t(asymp) = -1.382       | 0.8659     | 6              |
| Fig.4g,5d | Genotype*Lasers+ (1 Animal)            | Linear mixed effects model to test the differences in the time animals take to report their choice at one of the side ports after breaking fixation, as a function of genotype and manipulation.                                                                                                                     |       |                                       |                          |                      |                         |            |                |
|           |                                        | Mixed Anova with Satterthwaite's approximated d.f.                                                                                                                                                                                                                                                                   |       | Genotype:Lasers                       | BrokenFixation Mov. Time |                      | $F(1,2454.96) = 4.8377$ | 0.02794    | 5 iMSN, 6 dMSN |
|           |                                        | Post-Hoc, correction                                                                                                                                                                                                                                                                                                 | Tukey | iMSN:LaserOff vs iMSN:LaserOn         |                          | 7.82 [-482, 497.3]   | t(2454.77) = 0.041      | 1.0000     | 5              |
|           |                                        | Post-Hoc, correction                                                                                                                                                                                                                                                                                                 | Tukey | dMSN:LaserOff vs dMSN:LaserOn         |                          | -630.3[-1193, 97.6]  | t(2455.11) = -2.880     | 0.0209     | 6              |
| Fig.S5    | Genotype*Lasers+ (1 Animal)            | Linear mixed effects model to test the differences in the time animals take to report their choice at one of the side ports, after successfully completing a trial (Movement time, delay), between control and manipulated trials during the delay period.                                                           |       |                                       |                          |                      |                         |            |                |
|           |                                        | Mixed Anova with Satterthwaite's approximated d.f.                                                                                                                                                                                                                                                                   |       | Genotype:Lasers                       | Mov. Time                |                      | $F(1,14272.7) = 2.481$  | 0.115      | 5 iMSN, 6 dMSN |
|           | Movement Time(Delay)                   | Post-Hoc, correction                                                                                                                                                                                                                                                                                                 | Tukey | iMSN:LaserOff vs iMSN:LaserOn         |                          | 14.0 [-12.5, 40.5]   | t(14273.21) = 1.353     | 0.529      | 5              |
|           |                                        | Post-Hoc, correction                                                                                                                                                                                                                                                                                                 | Tukey | dMSN:LaserOff vs dMSN:LaserOn         |                          | -6.3[-26.0, 13.4]    | t(14271.67) = -0.820    | 0.845      | 6              |
| Fig.S5    | Lasers+ (1 Animal)                     | Linear mixed effects model to test the differences in the time animals take to report their choice at one of the side ports after successfully completing a trial (Movement time, decision) between control and manipulated trials during the decision epoch. (this experiment was only performed in D1-Cre Animals) |       |                                       |                          |                      |                         |            |                |
|           | Movement Time(Decision)                | Mixed Anova with Satterthwaite's approximated d.f.                                                                                                                                                                                                                                                                   |       | Lasers                                | Mov. Time                |                      | $F(5194.0) = 2.481$     | 0.70       | 3 dMSN         |

|  |  |                         |       |                     |    |  |                           |                          |      |        |
|--|--|-------------------------|-------|---------------------|----|--|---------------------------|--------------------------|------|--------|
|  |  |                         |       |                     |    |  |                           |                          |      |        |
|  |  | Post-Hoc,<br>correction | Tukey | LaserOff<br>LaserOn | vs |  | -2.8 [-<br>16.9,<br>11.3] | t(14273.21<br>) = -0.390 | 0.70 | 3 dMSN |

674

## 675 Supplemental Figure 1

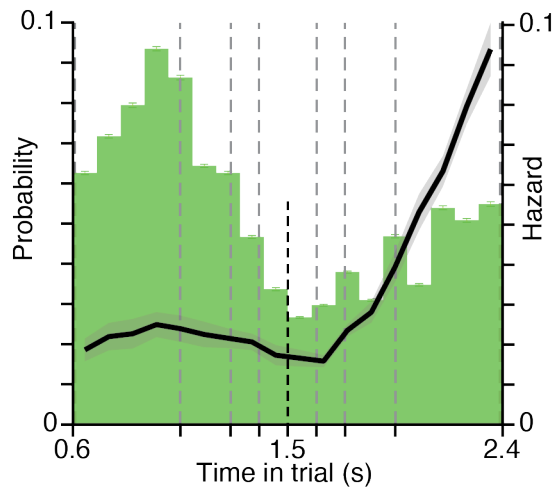

676

677

678 **Figure S1. Mice were least likely to break fixation near the decision boundary, and**  
679 **became increasingly likely to break fixation as time elapsed past the decision**  
680 **boundary.** Probability density function of Broken fixation occurrence as a function of time since first  
681 tone (green) and corresponding hazard rate (black full line). Grey dashed lines represent times at which  
682 a second tone might occur. Black dashed line represents the decision boundary (1.5s). All error bars  
683 represent s.e.m. across animals (n = 14).  
684



685 Supplemental Figure 2

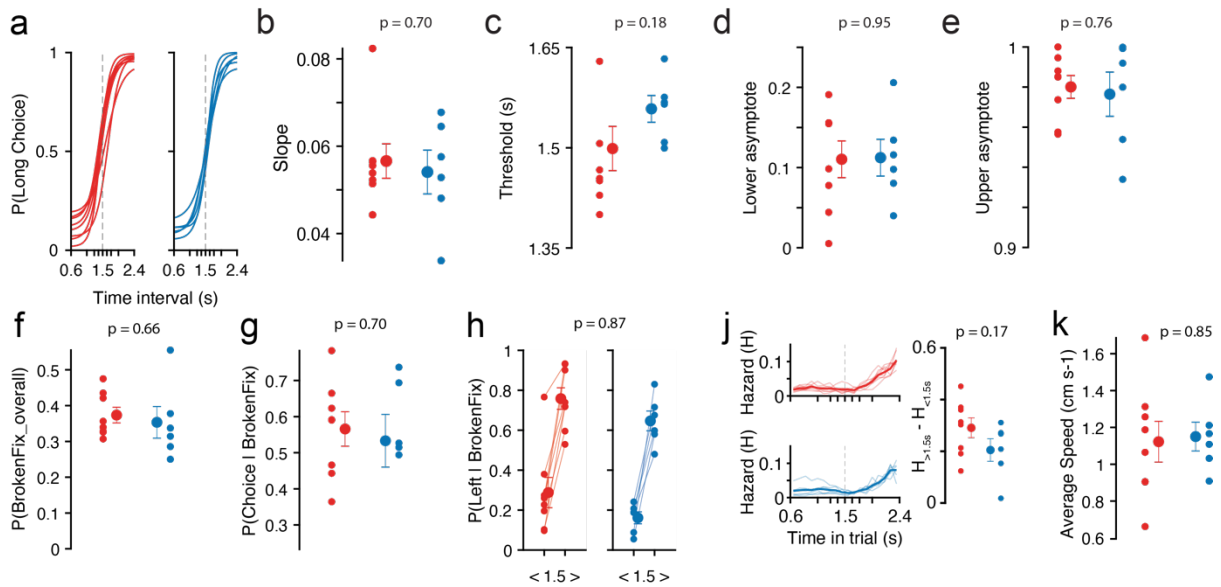

686  
687

688 **Figure S2. No significant differences in behavior were detected between genotypes.**  
 689 A2a-Cre and D1-Cre single animals, included in the photometry experiments, are shown in red and  
 690 blue, respectively. **a-e)** Single animal psychometric curve (**a**) fits and respective parameters (**b-e**) (see  
 691 Methods for further details). **f)** Overall probability of breaking fixation (all trials included). **g)** Percentage  
 692 of trials wherein animals attempted to make a choice after breaking fixation (all trials included). **h)**  
 693 Probability of reporting at the “long choice” port after breaking fixation contingent on whether the animal  
 694 aborted before (<1.5s) or after (>1.5s) the decision boundary. **j)** Left, Hazard of breaking fixation in  
 695 time for single animals (thin curves) and overall averages within genotype (thick lines). Right,  
 696 differences between the hazard of breaking fixation after and before the decision boundary. **k)** Mean  
 697 velocity during the delay period from correct trials of the longest interval (2.4 seconds). Data from Figure  
 698 1c). P-values correspond to unpaired t-tests between genotypes. Error bars represent S.E.M. across  
 699 animals sharing the same genotype.

700 Supplemental Figure 3

701

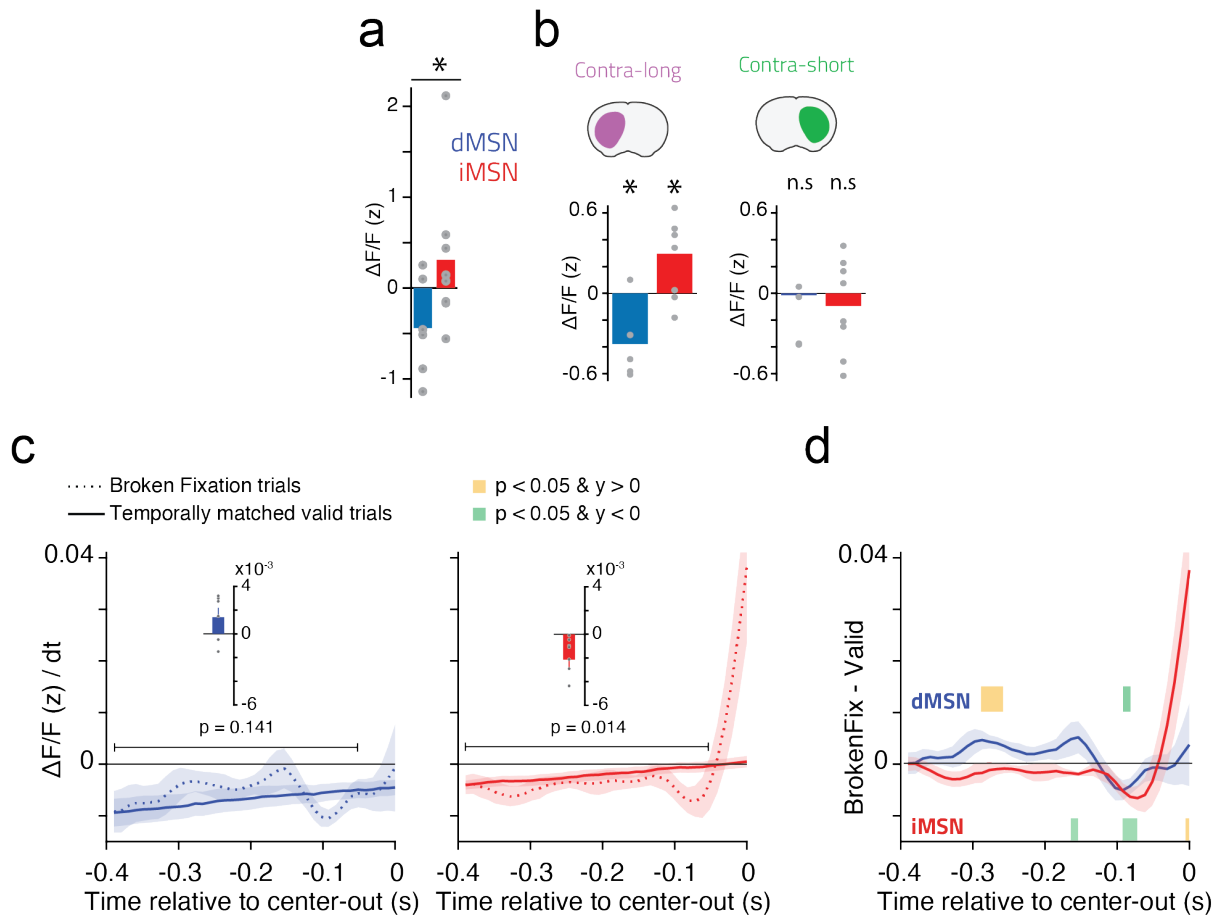

702

703

704 **Figure S3. Patterns of overall and interhemispheric activity in iMSNs and dMSNs differ**

705 **during, and predict failures in, action suppression. a)** Average activity across both

706 hemispheres during the immobility period for each mouse (data points) relative to baseline, and

707 across animal mean (bar). Activity for dMSNs is on the left and in blue, and iMSNs on the right and in

708 red (baseline: mean activity -5s to -2s relative to trial initiation, n=8 mice iMSN, n=6 mice dMSN, only

709 correct trials were included). **b)** Difference between average activity after the 1.5s decision boundary,

710 and before the 1.5s decision boundary (>1.5s - <1.5s) for activity recorded in the hemisphere contra-

711 lateral to the side of the long choice port (CL, contra-long, left panel) and for activity recorded in the

712 hemisphere contra-lateral to the short choice port (CS, contra-short, right panel). **c)** Rate of change

713 (derivative of  $\Delta F/F(z)$ ) preceding broken-fixations (dashed line) and time-matched valid trials (full line,

714 see methods) from D1-cre (blue) or A2a-Cre (red) animals. Insets represent the difference between

715 the overall average activity of Broken fixation and valid trials from -0.4 to -0.05 s. Grey dots depict

716 single animals. **d)** Difference between the broken fixation and valid traces plotted in c for each

717 genotype. Shaded areas show times wherein the activity between the rate of change of broken

718 fixations is significantly greater (yellow) or smaller (green) than valid trials (two-tailed paired t-test) for

719 direct (blue, top) and indirect pathway (red, bottom) recorded animals. n.s.:  $p > 0.05$ , \*:  $p < 0.05$ .

720 Supplemental Figure 4

721

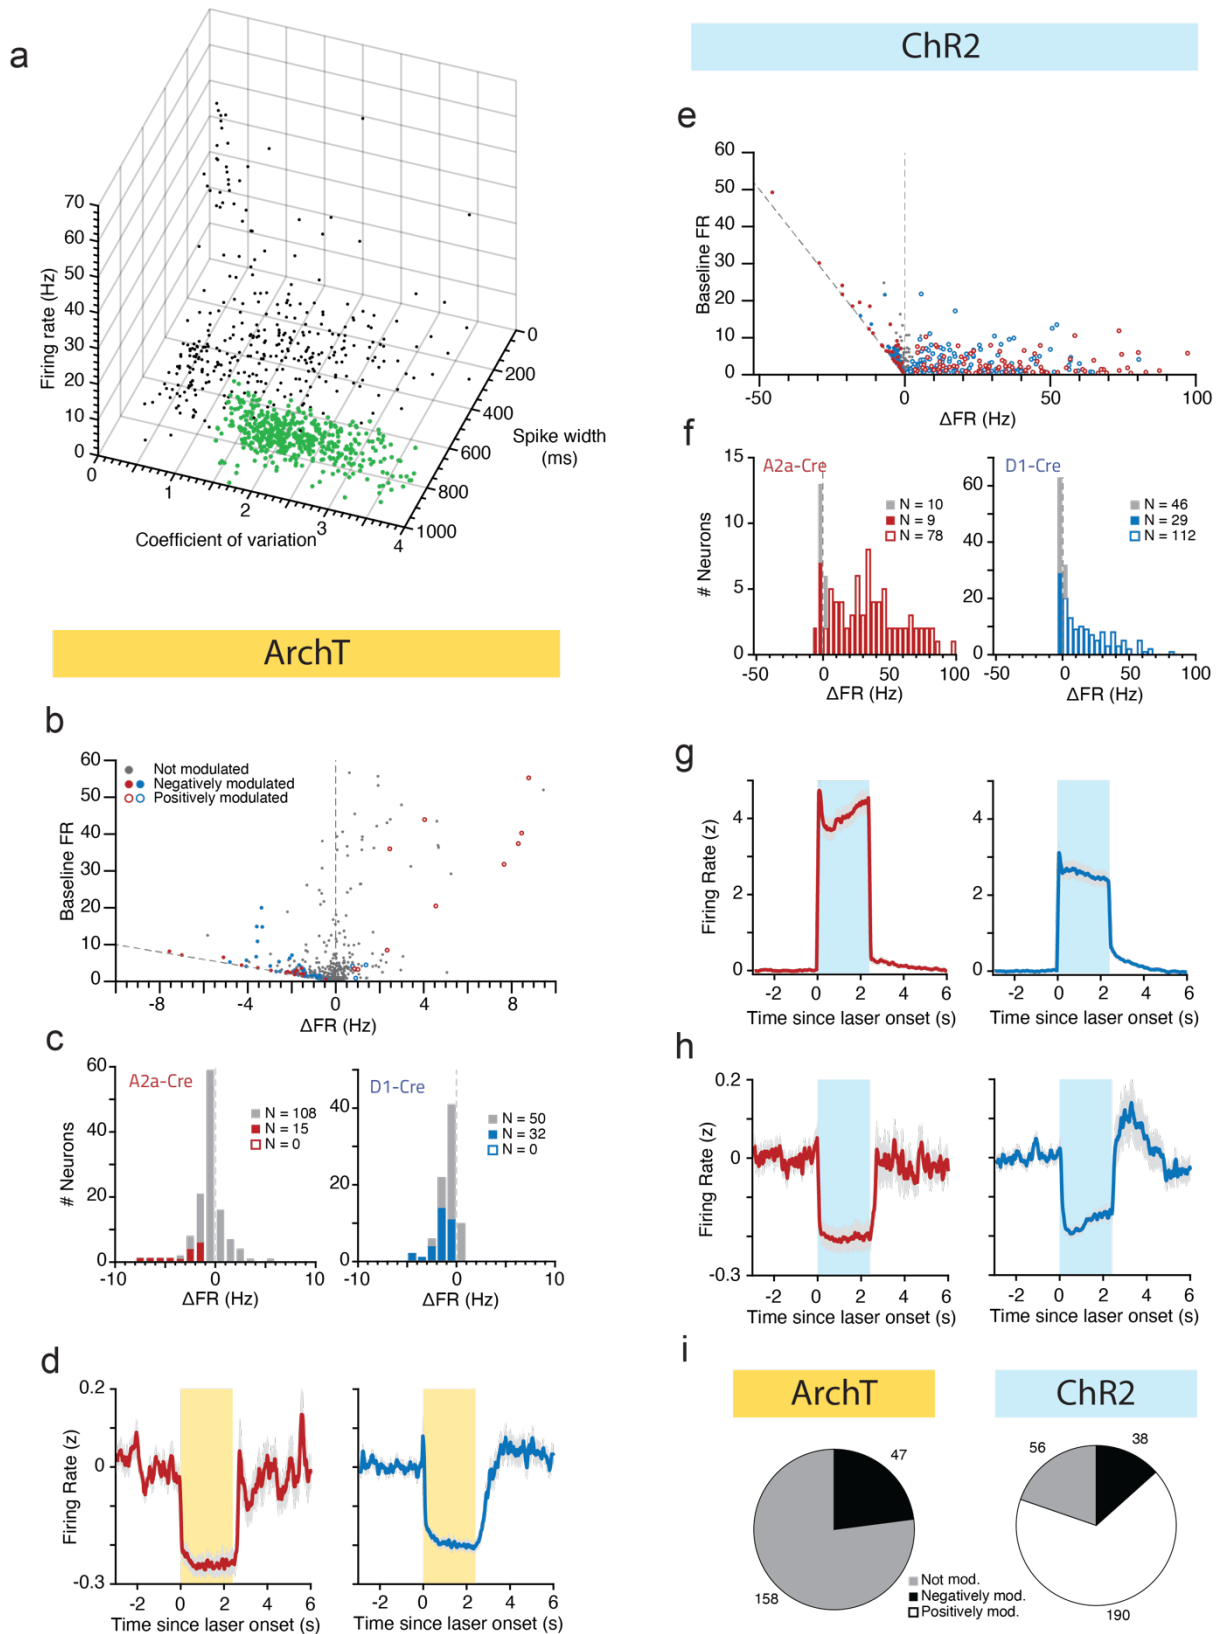

722

723

724

725

**Figure S4. *In vivo* ArchT activation produces fast and reversible inhibition of putative medium spiny neurons (pMSN), whereas ChR2 activation produces mostly excitation**

726 **but also inhibition of pMSNs. a)** Identification of putative medium spiny neurons based on firing  
727 statistics and waveform duration (see methods). Green data points indicate pMSNs. **b)** Changes in  
728 firing rate during light delivery and baseline period versus the baseline firing rate of all recorded units  
729 (including non pMSN units) from A2a-Cre (red) and D1-Cre (blue) animals. Significantly negative or  
730 positively modulated cells (see Methods) are shown as closed and open circles, respectively. Maximum  
731 theoretical inhibition is plotted as a grey dashed line ( $-\Delta FR = \text{Baseline FR}$ ). **c)** Distribution of changes  
732 in firing rate during the period of light delivery for putatively labeled MSN units. **d)** Overall average  
733 peristimulus time histogram (PSTH) of all negatively modulated cells, putatively labeled as MSNs,  
734 recorded from A2a-Cre (n=15 cells) and D1-Cre (n=32 cells) mice. All units were z-scored (see  
735 methods). Error bars represent s.e.m. across neurons. **e-f)** Same as b-c) but for animals expressing  
736 ChR2. **g-h)** Overall average peristimulus time histogram (PSTH) of all positively (g) and negatively (h)  
737 modulated cells, putatively labeled as MSNs, recorded from A2a-Cre (n=78 and 9 cells) and D1-Cre  
738 (n=112 and 29 cells) mice. **i)** Overall proportion of putative MSNs modulated when activating ArchT or  
739 ChR2. (obtained from the data from c and f, respectively).

740 Supplemental Figure 5

741

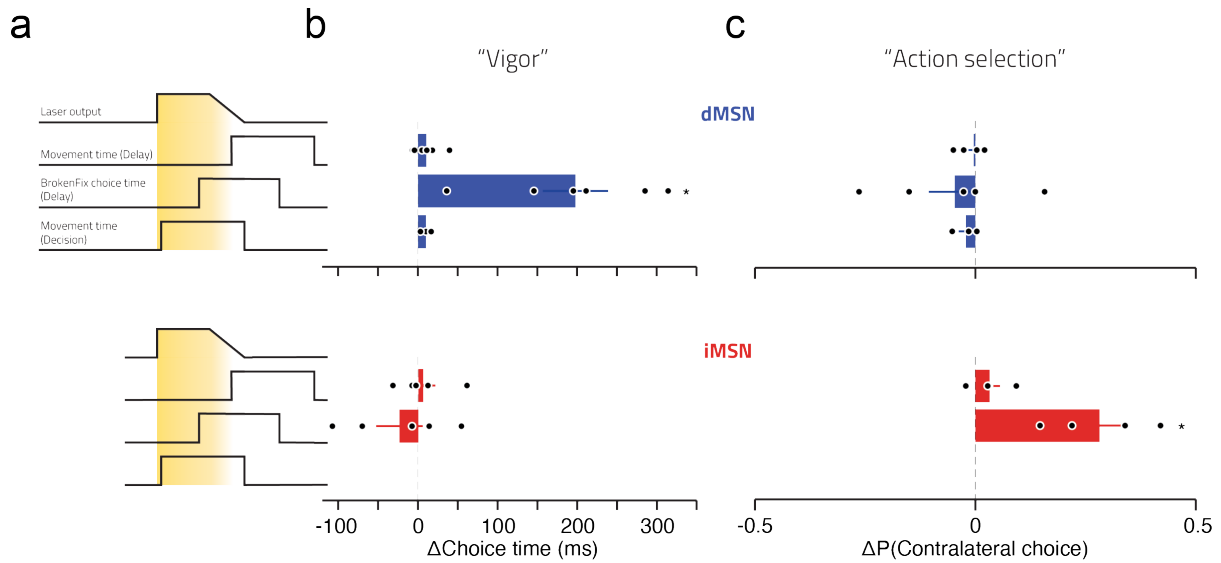

742

743 **Figure S5 - Manipulation-induced changes in vigor and action selection depended on**

744 **MSN type. a)** Cartoon depicts the three different manipulated trial types: Movement Time (Delay),

745 laser was ramped off as the second tone is played ( $n=6$  and 5 animals, for D1-Cre and A2a-Cre,

746 respectively). BrokenFix Choice Time (Delay), laser was ramped off as the animal leaves the centre

747 port causing a broken fixation ( $n=6$  and 5 animals). MovementTime (Decision) laser was turned on as

748 the second tone is played until the animal either performs its choice or 400ms elapse, whichever occurs

749 first ( $n=3$  D1-Cre animals). **b)** Differences in single animal's median choice time between inhibited and

750 non-inhibited trials. Error bars represent S.E.M. across animals sharing the same genotype. **c)**

751 Differences in the choice probability relative to the site of unilateral stimulation (Contralateral Choice)

752 between manipulated ( $n = 5$  D1-cre and  $n=4$  A2a-cre) and non-manipulated trials \*  $p < 0.05$  (see

753 Supplemental Table 1).

754 Supplemental Figure 6

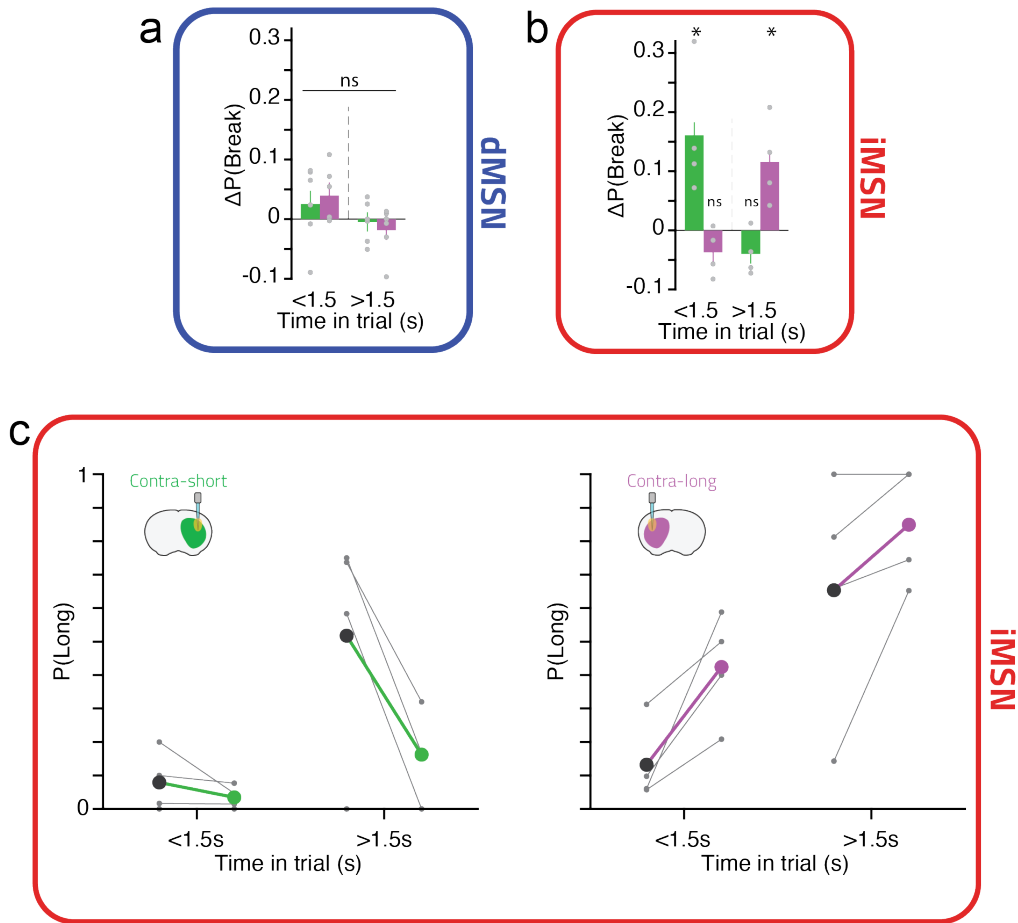

755

756 **Figure S6. Single animal distributions of the effect of unilateral optogenetic inhibition**  
 757 **on broken fixation behavior.** Same data as in figures 4h and 5f but pooled of periods before (<1.5s)  
 758 or after (>1.5s) the decision boundary. Single dots represent single animals, bars represent means  
 759 across animals, green: inhibition performed on the hemisphere contralateral to the side of the short  
 760 choice port, purple: inhibition performed on the hemisphere contralateral to the long choice port, for  
 761 dMSN inhibition experiments **a**) or iMSN inhibition experiments **b**). n.s.:  $p > 0.05$ , \*:  $p < 0.05$ . **c**) Bias to  
 762 report a contra-lateral choice after inhibition of iMSNs is not explained by the tendency of mice to make  
 763 particular choices after breaking fixation early or late in the delay. Each panel, one for manipulations  
 764 performed in each hemisphere, depicts the data shown in Fig. 5d further split by whether fixation was  
 765 broken before or after the 1.5s decision boundary.



766 Supplemental Figure 7

767

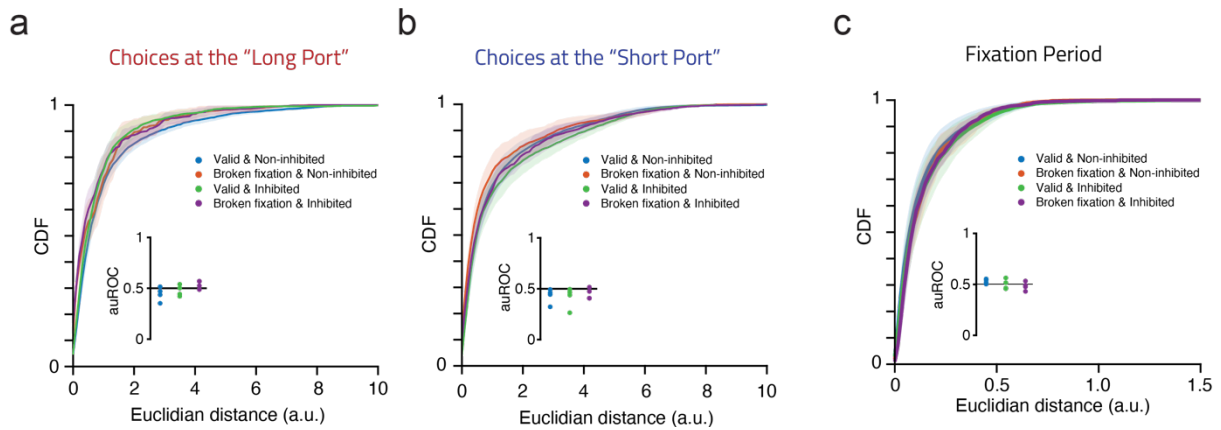

768

769

770 **Figure S7. Indirect pathway inhibition did not affect movement trajectories.** Quantification  
771 of movement trajectory differences between conditions from Fig. 5h-i. **a-c)** Distribution of pairwise  
772 euclidean distances (see methods for details) between all indicated conditions and the non-inhibited  
773 broken fixation condition. Inset represents the area under the curve of the receiver operating  
774 characteristic curve (auROC) calculated between the tested distributions and the non-inhibited broken  
775 fixation condition. **a)** and **b)** distributions were generated from choice trajectories to the "Long" and  
776 "Short" ports, respectively, whereas **c)** was generated from data during the fixation period. For all  
777 analysis, only sessions with unilateral inhibition were used. When comparing a broken fixation condition  
778 during a fixation period, only data up until the animal's nose left the center port was used. Error bars  
779 represent S.E.M. across animals (n=4). No significant effects were detected across animals ( $p > 0.05$ ,  
780 two-tailed t-test).

781 Supplemental Figure 8

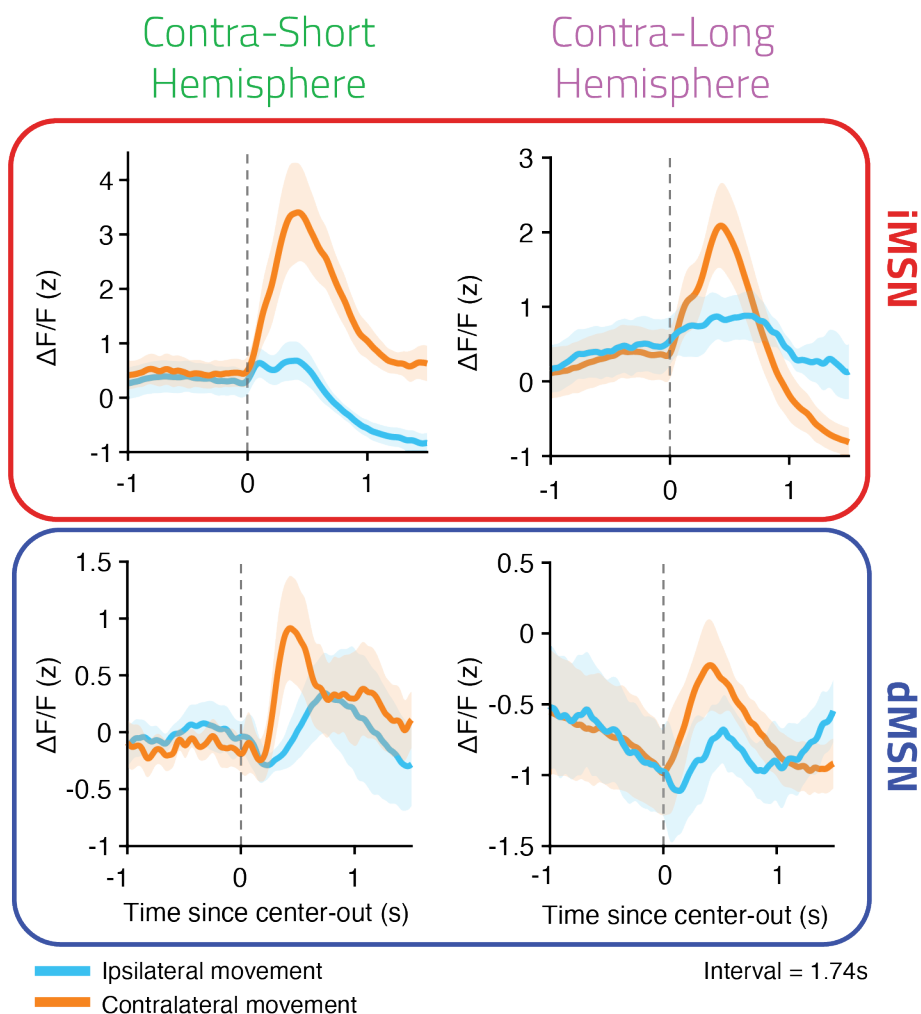

782

783

784 **Figure S8. Both direct and indirect pathways are more active during contra-lateral**

785 **movements.** Photometry signal aligned to leaving the center-port during a near boundary interval

786 (1.74s). Same dataset as Figure 3. Error bars represent S.E.M. across animals sharing the same

787 genotype.

## 788 References

789

790 Albin, R.L., Young, A.B., and Penney, J.B. (1989). The functional anatomy of basal ganglia disorders.  
791 *Trends Neurosci.* *12*, 366–375.

792 Alexander, G.E., and Crutcher, M.D. (1990). Functional architecture of basal ganglia circuits: neural  
793 substrates of parallel processing. *Trends Neurosci.* *13*, 266–271.

794 Amita, H., and Hikosaka, O. (2019). Indirect pathway from caudate tail mediates rejection of bad  
795 objects in periphery. *Sci Adv* *5*, eaaw9297.

796 Barbera, G., Liang, B., Zhang, L., Gerfen, C.R., Culurciello, E., Chen, R., Li, Y., and Lin, D.-T. (2016).  
797 Spatially Compact Neural Clusters in the Dorsal Striatum Encode Locomotion Relevant Information.  
798 *Neuron* *92*, 202–213.

799 Barkley, R.A. (1997). Behavioral inhibition, sustained attention, and executive functions: constructing  
800 a unifying theory of ADHD. *Psychol. Bull.* *121*, 65–94.

801 Bates, D., Mächler, M., Bolker, B., and Walker, S. (2015). Fitting Linear Mixed-Effects Models Using  
802 lme4. *Journal of Statistical Software, Articles* *67*, 1–48.

803 Benhamou, L., Kehat, O., and Cohen, D. (2014). Firing pattern characteristics of tonically active  
804 neurons in rat striatum: context dependent or species divergent? *J. Neurosci.* *34*, 2299–2304.

805 Chen, T.-W., Wardill, T.J., Sun, Y., Pulver, S.R., Renninger, S.L., Baohan, A., Schreiter, E.R., Kerr,  
806 R.A., Orger, M.B., Jayaraman, V., et al. (2013). Ultrasensitive fluorescent proteins for imaging  
807 neuronal activity. *Nature* *499*, 295–300.

808 Chuong, A.S., Miri, M.L., Busskamp, V., Matthews, G.A.C., Acker, L.C., Sørensen, A.T., Young, A.,  
809 Klapoetke, N.C., Henninger, M.A., Kodandaramaiah, S.B., et al. (2014). Noninvasive optical inhibition  
810 with a red-shifted microbial rhodopsin. *Nat. Neurosci.* *17*, 1123–1129.

811 Coddington, L.T., and Dudman, J.T. (2018). The timing of action determines reward prediction signals  
812 in identified midbrain dopamine neurons. *Nat. Neurosci.* *21*, 1563–1573.

813 Cui, G., Jun, S.B., Jin, X., Pham, M.D., Vogel, S.S., Lovinger, D.M., and Costa, R.M. (2013).  
814 Concurrent activation of striatal direct and indirect pathways during action initiation. *Nature* *494*, 238–  
815 242.

816 Deniau, J.M., and Chevalier, G. (1985). Disinhibition as a basic process in the expression of striatal  
817 functions. II. The striato-nigral influence on thalamocortical cells of the ventromedial thalamic nucleus.  
818 *Brain Res.* *334*, 227–233.

819 Denny-Brown, D., and Yanagisawa, N. (1976). The role of the basal ganglia in the initiation of  
820 movement. *Res. Publ. Assoc. Res. Nerv. Ment. Dis.* *55*, 115–149.

821 Doya, K. (1999). What are the computations of the cerebellum, the basal ganglia and the cerebral  
822 cortex? *Neural Netw.* *12*, 961–974.

823 Ford, K.A., and Everling, S. (2009). Neural activity in primate caudate nucleus associated with pro-  
824 and antisaccades. *J. Neurophysiol.* *102*, 2334–2341.

825 Franklin, K.B.J., and Paxinos, G. (2008). *The mouse brain in stereotaxic coordinates* 3rd edn.

826 Freeze, B.S., Kravitz, A.V., Hammack, N., Berke, J.D., and Kreitzer, A.C. (2013). Control of basal  
827 ganglia output by direct and indirect pathway projection neurons. *J. Neurosci.* *33*, 18531–18539.

828 Gerfen, C.R., and Surmeier, D.J. (2011). Modulation of striatal projection systems by dopamine.

- 829 Annu. Rev. Neurosci. 34, 441–466.
- 830 Gerfen, C.R., Paletzki, R., and Heintz, N. (2013). GENSAT BAC cre-recombinase driver lines to study  
831 the functional organization of cerebral cortical and basal ganglia circuits. *Neuron* 80, 1368–1383.
- 832 Gouvêa, T.S., Monteiro, T., Motiwala, A., Soares, S., Machens, C., and Paton, J.J. (2015). Striatal  
833 dynamics explain duration judgments. *Elife* 4.
- 834 Han, X., Chow, B.Y., Zhou, H., Klapoetke, N.C., Chuong, A., Rajimehr, R., Yang, A., Baratta, M.V.,  
835 Winkle, J., Desimone, R., et al. (2011). A high-light sensitivity optical neural silencer: development  
836 and application to optogenetic control of non-human primate cortex. *Front. Syst. Neurosci.* 5, 18.
- 837 Hintiryan, H., Foster, N.N., Bowman, I., Bay, M., Song, M.Y., Gou, L., Yamashita, S., Bienkowski,  
838 M.S., Zingg, B., Zhu, M., et al. (2016). The mouse cortico-striatal projectome. *Nat. Neurosci.* 19,  
839 1100–1114.
- 840 Hunnicutt, B.J., Jongbloets, B.C., Birdsong, W.T., Gertz, K.J., Zhong, H., and Mao, T. (2016). A  
841 comprehensive excitatory input map of the striatum reveals novel functional organization. *Elife* 5.
- 842 Klaus, A., Martins, G.J., Paixao, V.B., Zhou, P., Paninski, L., and Costa, R.M. (2017). The  
843 Spatiotemporal Organization of the Striatum Encodes Action Space. *Neuron* 96, 949.
- 844 Kravitz, A.V., Freeze, B.S., Parker, P.R.L., Kay, K., Thwin, M.T., Deisseroth, K., and Kreitzer, A.C.  
845 (2010). Regulation of parkinsonian motor behaviours by optogenetic control of basal ganglia circuitry.  
846 *Nature* 466, 622–626.
- 847 Kravitz, A.V., Tye, L.D., and Kreitzer, A.C. (2012). Distinct roles for direct and indirect pathway striatal  
848 neurons in reinforcement. *Nat. Neurosci.* 15, 816–818.
- 849 Lau, B., and Glimcher, P.W. (2007). Action and outcome encoding in the primate caudate nucleus. *J.*  
850 *Neurosci.* 27, 14502–14514.
- 851 Lenth, R. (2016). Least-Squares Means: The R Package lsmeans. *Journal of Statistical Software,*  
852 *Articles* 69, 1–33.
- 853 Lopes, G., Bonacchi, N., Frazão, J., Neto, J.P., Atallah, B.V., Soares, S., Moreira, L., Matias, S.,  
854 Itskov, P.M., Correia, P.A., et al. (2015). Bonsai: an event-based framework for processing and  
855 controlling data streams. *Front. Neuroinform.* 9, 7.
- 856 Madisen, L., Mao, T., Koch, H., Zhuo, J.-M., Berenyi, A., Fujisawa, S., Hsu, Y.-W.A., Garcia, A.J., 3rd,  
857 Gu, X., Zanella, S., et al. (2012). A toolbox of Cre-dependent optogenetic transgenic mice for light-  
858 induced activation and silencing. *Nat. Neurosci.* 15, 793–802.
- 859 Majid, D.S.A., Cai, W., Corey-Bloom, J., and Aron, A.R. (2013). Proactive selective response  
860 suppression is implemented via the basal ganglia. *Journal of Neuroscience* 33, 13259–13269.
- 861 Markowitz, J.E., Gillis, W.F., Beron, C.C., Neufeld, S.Q., Robertson, K., Bhagat, N.D., Peterson, R.E.,  
862 Peterson, E., Hyun, M., Linderman, S.W., et al. (2018). The Striatum Organizes 3D Behavior via  
863 Moment-to-Moment Action Selection. *Cell* 174, 44–58.e17.
- 864 Mathis, A., Mamidanna, P., Cury, K.M., Abe, T., Murthy, V.N., Mathis, M.W., and Bethge, M. (2018).  
865 DeepLabCut: markerless pose estimation of user-defined body parts with deep learning. *Nat.*  
866 *Neurosci.* 21, 1281–1289.
- 867 Matias, S., Lottem, E., Dugué, G.P., and Mainen, Z.F. (2017). Activity patterns of serotonin neurons  
868 underlying cognitive flexibility. *Elife* 6.
- 869 Mink, J.W. (1996). The basal ganglia: focused selection and inhibition of competing motor programs.  
870 *Prog. Neurobiol.* 50, 381–425.
- 871 Pachitariu, M., Steinmetz, N., Kadir, S., Carandini, M., and Harris, K.D. Kilosort: realtime spike-sorting

- 872 for extracellular electrophysiology with hundreds of channels.
- 873 Panigrahi, B., Martin, K.A., Li, Y., Graves, A.R., Vollmer, A., Olson, L., Mensh, B.D., Karpova, A.Y.,  
874 and Dudman, J.T. (2015). Dopamine Is Required for the Neural Representation and Control of  
875 Movement Vigor. *Cell* 162, 1418–1430.
- 876 Park, J., Coddington, L.T., and Dudman, J.T. (2020). Basal Ganglia Circuits for Action Specification.  
877 *Annu. Rev. Neurosci.* 43.
- 878 Parker, J.G., Marshall, J.D., Ahanonu, B., Wu, Y.-W., Kim, T.H., Grewe, B.F., Zhang, Y., Li, J.Z.,  
879 Ding, J.B., Ehlers, M.D., et al. (2018). Diametric neural ensemble dynamics in parkinsonian and  
880 dyskinesic states. *Nature* 557, 177–182.
- 881 Pisanello, F., Mandelbaum, G., Pisanello, M., Oldenburg, I.A., Sileo, L., Markowitz, J.E., Peterson,  
882 R.E., Della Patria, A., Haynes, T.M., Emara, M.S., et al. (2017). Dynamic illumination of spatially  
883 restricted or large brain volumes via a single tapered optical fiber. *Nat. Neurosci.* 20, 1180–1188.
- 884 Redgrave, P., Prescott, T.J., and Gurney, K. (1999). The basal ganglia: a vertebrate solution to the  
885 selection problem? *Neuroscience* 89, 1009–1023.
- 886 Rueda-Orozco, P.E., and Robbe, D. (2015). The striatum multiplexes contextual and kinematic  
887 information to constrain motor habits execution. *Nat. Neurosci.* 18, 453–460.
- 888 Schultz, W. (1995). The Primate Basal Ganglia Between the Intention and Outcome of Action.  
889 *Functions of the Cortico-Basal Ganglia Loop* 31–48.
- 890 Schwarting, R.K., and Huston, J.P. (1996). The unilateral 6-hydroxydopamine lesion model in  
891 behavioral brain research. Analysis of functional deficits, recovery and treatments. *Prog. Neurobiol.*  
892 50, 275–331.
- 893 Searle, S.R., Speed, F.M., and Milliken, G.A. (1980). Population Marginal Means in the Linear Model:  
894 An Alternative to Least Squares Means. *Am. Stat.* 34, 216–221.
- 895 Siegle, J.H., López, A.C., Patel, Y.A., Abramov, K., Ohayon, S., and Voigts, J. (2017). Open Ephys:  
896 an open-source, plugin-based platform for multichannel electrophysiology. *J. Neural Eng.* 14, 045003.
- 897 Sippy, T., Lapray, D., Crochet, S., and Petersen, C.C.H. (2015). Cell-Type-Specific Sensorimotor  
898 Processing in Striatal Projection Neurons during Goal-Directed Behavior. *Neuron* 88, 298–305.
- 899 Smith, Y., Bevan, M.D., Shink, E., and Bolam, J.P. (1998). Microcircuitry of the direct and indirect  
900 pathways of the basal ganglia. *Neuroscience* 86, 353–387.
- 901 Soares, S., Atallah, B.V., and Paton, J.J. (2016). Midbrain dopamine neurons control judgment of  
902 time. *Science* 354, 1273–1277.
- 903 Tai, L.-H., Lee, A.M., Benavidez, N., Bonci, A., and Wilbrecht, L. (2012). Transient stimulation of  
904 distinct subpopulations of striatal neurons mimics changes in action value. *Nat. Neurosci.* 15, 1281–  
905 1289.
- 906 Tecuapetla, F., Matias, S., Dugue, G.P., Mainen, Z.F., and Costa, R.M. (2014). Balanced activity in  
907 basal ganglia projection pathways is critical for contraversive movements. *Nat. Commun.* 5, 4315.
- 908 Tecuapetla, F., Jin, X., Lima, S.Q., and Costa, R.M. (2016). Complementary Contributions of Striatal  
909 Projection Pathways to Action Initiation and Execution. *Cell* 166, 703–715.
- 910 Turner, R.S., and Desmurget, M. (2010). Basal ganglia contributions to motor control: a vigorous  
911 tutor. *Curr. Opin. Neurobiol.* 20, 704–716.
- 912 Wall, N.R., De La Parra, M., Callaway, E.M., and Kreitzer, A.C. (2013). Differential innervation of  
913 direct- and indirect-pathway striatal projection neurons. *Neuron* 79, 347–360.

- 914 Watanabe, M., and Munoz, D.P. (2010). Presetting basal ganglia for volitional actions. *J. Neurosci.*  
915 *30*, 10144–10157.
- 916 Yael, D., Zeef, D.H., Sand, D., Moran, A., Katz, D.B., Cohen, D., Temel, Y., and Bar-Gad, I. (2013).  
917 Haloperidol-induced changes in neuronal activity in the striatum of the freely moving rat. *Front. Syst.*  
918 *Neurosci.* *7*, 110.
- 919 Yttri, E.A., and Dudman, J.T. (2016). Opponent and bidirectional control of movement velocity in the  
920 basal ganglia. *Nature* *533*, 402–406.
